# Supplementary material for: An effective and general method for the highly regioselective synthesis of 1-phenylpyrazoles from β-enaminoketoesters, tandem Blaise–acylation adducts
Source: Royal Society of Chemistry journal article supplement (doi:10.1039/b820324e), 2009-01-01

## Supporting Information

### **An effective and general method for highly regioselective synthesis of 1-phenylpyrazoles from $\beta$ -enaminoketoesters, tandem Blaise-acylation adducts**

Young Ok Ko,<sup>a</sup> Yu Sung Chun,<sup>a</sup> Cho-Long Park,<sup>a</sup> Youngmee Kim,<sup>a</sup> Hyunik Shin,<sup>b\*</sup>  
Sungho Ahn,<sup>c</sup> Jongki Hong,<sup>c</sup> Sang-gi Lee<sup>a\*</sup>

<sup>a</sup>Department of Chemistry and Nano Science (BK21), Ewha Womans University, Seoul 120-750, Korea. <sup>b</sup>Chemical Development Division, LG Life Sciences, Ltd./R&D, Daejeon 305-380, Korea. <sup>c</sup>College of Pharmacy, Kyung Hee University, Seoul 130-701, Korea

1. General and experimental procedures and <sup>1</sup>H NMR and <sup>13</sup>C NMR, and HR-MS data for **1a~1k**, **2a~2k**, and **3** -----S2~S6
2. Table S1. Crystal data for **2a** -----S7
3. Table S2. Crystal data for **2b** -----S8
4. Table S3. Crystal data for **2e** -----S9
5. Table S4. Crystal data for **2f** -----S10
6. <sup>1</sup>H NMR and <sup>13</sup>C NMR spectra for **1a~1k**, **2a~2k**, and **3**-----S11~S33

**General.** All reactions and manipulations were performed in a nitrogen atmosphere using standard Schlenk techniques. The reaction solvents were distilled prior to use (THF: distilled from sodium benzophenone ketyl). All purchased reagents were used without further purification. Anhydrous solvents were transferred by oven-dried syringe. Flasks were flames dried under a stream of nitrogen. The NMR spectra were recorded at 250 MHz ( $^1\text{H}$ )/62.5 MHz ( $^{13}\text{C}$ ). The chemical shifts were relative to TMS (as an internal reference) for  $^1\text{H}$  NMR.

**General Procedures for the Synthesis of  $\beta$ -Enaminoketoesters 1.** To a stirred suspension of commercial zinc dust (Aldrich, 10  $\mu\text{m}$ , 0.65 g, 10 mmol) in THF (2.5 mL) was added 5 mol% of methansulfonic acid and the mixture was heated at reflux for 10 min. To the mixture was added benzonitrile (0.52 mL, 5 mmol) in one portion followed by addition of ethyl bromoacetate (0.83 mL, 7.5 mmol) over 1h by using syringe pump while maintaining the reflux temperature. After 1h stirring, the reaction mixture was cooled to 0  $^\circ\text{C}$  and added 1.0 equivalent of *n*-BuLi (2M in cyclohexane, 2.5 mL, 5 mmol) and acetic anhydride (0.62 mL, 6.5 mmol) in sequence. The reaction temperature was allowed to room temperature and stirred for 3 h. The reaction was quenched by addition of sat'd  $\text{NH}_4\text{Cl}$  (aq.) and extracted with ethyl acetate. The organic layer was washed with water, brine, and dried over anhydrous  $\text{MgSO}_4$ . After evaporation of solvent, the residue was purified by column chromatography on silica gel (eluent: *n*-hexane: EtOAc = 1: 1) to afford the product **1a** (0.96 g, 4 mmol, 82 %).

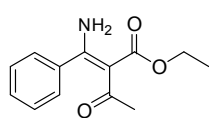

**1a:** Yield : 82 %,  $^1\text{H}$  NMR (250 MHz,  $\text{CDCl}_3$ )  $\delta$  0.71 (t,  $J$  = 7.2 Hz, 3H), 2.38 (s, 3H), 3.76 (q,  $J$  = 7.2 Hz, 2H), 5.49 (bs, 1H), 7.36 ~ 7.45 (m, 5H), 11.00 (bs, 1H) ppm;  $^{13}\text{C}$  NMR (62.5 MHz,  $\text{CDCl}_3$ )  $\delta$  13.3, 29.4, 60.0, 104.1, 126.6, 128.6, 130.0, 138.4, 166.9, 169.8, 197.1 ppm; HRMS (ESI) Cal. for ( $\text{M}^+ + \text{H}$ ):  $\text{C}_{13}\text{H}_{16}\text{NO}_3$ : 234.1130. Found: 234.1121.

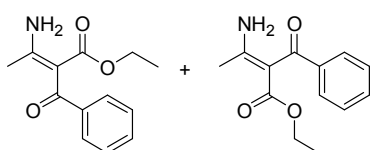

**1b:** Yield : 81 % ( E/Z = 1:1),  $^1\text{H}$  NMR (250 MHz,  $\text{CDCl}_3$ )  $\delta$  [0.68 (t,  $J$  = 7.2 Hz) + 0.77 (t,  $J$  = 7.1 Hz)] (3H), [2.13 (s) + 2.33 (s)] (3H), [3.77 (q,  $J$  = 7.1 Hz) + 3.89 (q,  $J$  = 7.1 Hz)] (2H), [5.80 (bs) + 6.35 (bs)] (1H), 7.29 ~ 7.74 (m, 10H), [9.05 (bs) + 10.71 (bs)] (1H) ppm;  $^{13}\text{C}$  NMR (62.5 MHz,  $\text{CDCl}_3$ )  $\delta$  13.2, 13.6, 21.6, 22.5, 59.1, 60.0, 99.0, 102.0, 126.4, 127.9, 128.0, 128.3, 129.8, 131.5, 141.7, 143.4, 165.1, 168.1, 169.3, 170.0, 195.0, 196.3 ppm; HRMS (ESI) Cal. for ( $\text{M}^+ + \text{H}$ ):  $\text{C}_{13}\text{H}_{16}\text{NO}_3$ : 234.1130. Found: 234.1144.

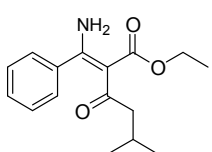

**1c:** Yield : 94 %,  $^1\text{H}$  NMR (250 MHz,  $\text{CDCl}_3$ )  $\delta$  0.70 (t,  $J$  = 7.2 Hz, 3H), 0.95 (d,  $J$  = 6.6 Hz, 6H), 2.11 ~ 2.22 (m, 1H), 2.58 (d,  $J$  = 7.0 Hz, 2H), 3.73 (q,  $J$  = 7.2 Hz, 2H), 5.58 (bs, 1H), 7.35 ~ 7.47 (m, 5H),

11.39 (bs, 1H) ppm;  $^{13}\text{C}$  NMR (62.5 MHz,  $\text{CDCl}_3$ )  $\delta$  13.3, 22.8, 25.5, 49.4, 60.1, 104.6, 126.6, 128.6, 130.0, 138.4, 166.4, 169.9, 199.1 ppm; HRMS (ESI) Cal. for  $(\text{M}^+ + \text{H})$ :  $\text{C}_{16}\text{H}_{22}\text{NO}_3$ : 276.1600. Found: 276.1586.

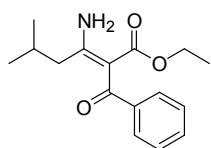

+

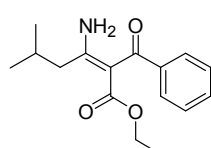

**1d:** Yield : 90 % ( E/Z = 1:1),  $^1\text{H}$  NMR (250 MHz,  $\text{CDCl}_3$ )  $\delta$  [0.68 (t,  $J$  = 7.1 Hz) + 0.75 (t,  $J$  = 7.1 Hz)] (3H), [0.91 (d,  $J$  = 6.6 Hz) + 0.99 (d,  $J$  = 6.6 Hz)] (6H), [1.80 ~ 1.96 (m) + 1.98 ~

2.11 (m)] (1H), [2.36 (d,  $J$  = 7.5 Hz) + 2.56 (d,  $J$  = 7.3 Hz)] (2H), [3.75 (q,  $J$  = 7.1 Hz) + 3.89 (q,  $J$  = 7.1 Hz)] (2H), [5.64 (bs) + 6.14 (bs,)] (1H), 7.34 ~ 7.76 (m, 5H), [9.14 (bs) + 10.81 (bs)] (1H) ppm;  $^{13}\text{C}$  NMR (62.5 MHz,  $\text{CDCl}_3$ )  $\delta$  13.2, 13.6, 22.3, 22.4, 28.1, 28.5, 42.8, 43.6, 59.1, 60.0, 99.0, 102.2, 126.4, 127.9, 128.0, 128.3, 128.4, 129.8, 130.0, 131.5, 141.9, 143.4, 167.7, 169.5, 170.0, 170.6, 195.2, 196.3 ppm; HRMS (ESI) Cal. for  $(\text{M}^+ + \text{H})$ :  $\text{C}_{16}\text{H}_{22}\text{NO}_3$ : 276.1600. Found: 276.1618.

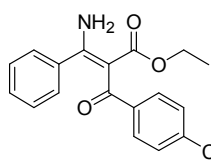

+

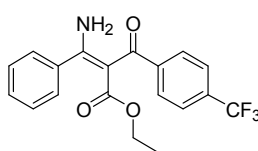

**1e:** Yield : 84 % ( E/Z = 1.23/1),  $^1\text{H}$  NMR (250 MHz,  $\text{CDCl}_3$ )  $\delta$  [0.62 (t,  $J$  = 7.1 Hz) + 0.92 (t,  $J$  = 7.1 Hz)] (3H), [3.60 (q,  $J$  = 7.1 Hz) + 4.03 (q,  $J$  = 7.1 Hz)]

(2H), [5.45 (bs) + 5.94 (bs)] (1H), 7.26-7.86 (m, 9H), [9.15 (bs) + 10.78 (bs)] (1H) ppm;  $^{13}\text{C}$  NMR (62.5 MHz,  $\text{CDCl}_3$ )  $\delta$  13.1, 13.8, 59.7, 60.3, 99.7, 103.6, 124.89, 124.92, 124.95, 124.98, 126.7, 126.8, 127.3, 128.6, 128.7, 128.9, 130.2, 130.3, 136.8, 137.1, 144.0, 145.8, 166.0, 168.2, 168.5, 169.0, 193.1, 194.2 ppm; HRMS (ESI) Cal. for  $(\text{M}^+ + \text{H})$ :  $\text{C}_{19}\text{H}_{17}\text{F}_3\text{NO}_3$ : 364.1161. Found: 364.1157.

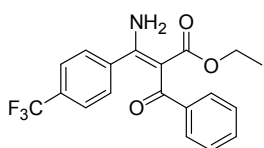

+

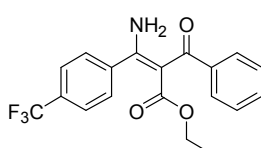

**1f:** Yield : 89 % ( E/Z = 2/1),  $^1\text{H}$  NMR (250 MHz,  $\text{CDCl}_3$ )  $\delta$  [0.61 (t,  $J$  = 7.1 Hz) + 0.92 (t,  $J$  = 7.1 Hz)] (3H), [3.60 (q,  $J$  = 7.1 Hz) + 4.03 (q,  $J$  = 7.1 Hz)]

(2H), [5.38 (bs) + 5.81 (bs)] (1H), 7.19-7.73 (m, 9H), [9.02 (bs) + 10.6 (bs)] (1H) ppm;  $^{13}\text{C}$  NMR (62.5 MHz,  $\text{CDCl}_3$ )  $\delta$  13.1, 13.8, 59.7, 60.3, 100.9, 103.7, 125.5, 126.0, 126.5, 127.5, 128.0, 128.1, 128.7, 130.4, 131.4, 132.0, 132.1, 140.4, 140.6, 140.7, 142.2, 163.1, 165.5, 168.6, 168.9, 194.9, 195.0 ppm; HRMS (ESI) Cal. for  $(\text{M}^+ + \text{H})$ :  $\text{C}_{19}\text{H}_{17}\text{F}_3\text{NO}_3$ : 364.1161. Found: 364.1164.

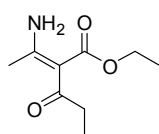

**1g:** Yield : 82 %,  $^1\text{H}$  NMR (250 MHz,  $\text{CDCl}_3$ )  $\delta$  1.09 (t,  $J$  = 7.4 Hz, 3H), 1.33 (t,  $J$  = 7.1 Hz, 3H), 2.20 (s, 3H), 2.60 (q,  $J$  = 7.4 Hz, 2H), 4.23 (q,  $J$  = 7.1 Hz, 2H), 6.34 (bs, 1H), 11.1 (bs, 1H) ppm;  $^{13}\text{C}$  NMR (62.5 MHz,  $\text{CDCl}_3$ )  $\delta$  9.6, 14.1, 23.0, 34.3, 60.2, 102.9, 166.6, 169.9, 200.0 ppm;

HRMS (ESI) Cal. for ( $M^+ + H$ ): $C_9H_{16}NO_3$ :186.1130. Found: 186.1139.

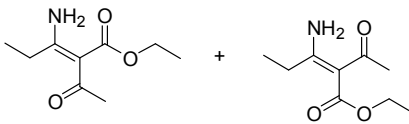 **1h**: Yield : 86 % (E/Z = 1:1),  $^1H$  NMR (250 MHz,  $CDCl_3$ )  $\delta$  [1.21 (t,  $J$  = 7.5 Hz) + 1.22 (t,  $J$  = 7.5 Hz)] (3H), [1.32 (t,  $J$  = 7.1 Hz) + 1.33 (t,  $J$  = 7.1 Hz)] (3H), [2.27 (s) + 2.28 (s)] (3H), 2.53 (q,  $J$  = 7.5 Hz, 2H), [4.23 (q,  $J$  = 7.1 Hz) + 4.24 (q,  $J$  = 7.1 Hz)] (2H), [5.65 (bs) + 5.67 (bs)] (1H), 11.2 (bs, 1H) ppm;  $^{13}C$  NMR (62.5 MHz,  $CDCl_3$ )  $\delta$  12.4, 14.2, 28.9, 29.9, 60.2, 104.3, 169.7, 171.3, 196.9 ppm; HRMS (ESI) Cal. for ( $M^+ + H$ ): $C_9H_{16}NO_3$ :186.1130. Found: 186.1129.

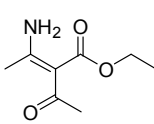 **1i**: Yield : 83 %,  $^1H$  NMR (250 MHz,  $CDCl_3$ )  $\delta$  1.33 (t,  $J$  = 7.1 Hz, 3H), 2.24 (s, 3H), 2.30 (s, 3H), 4.23 (q,  $J$  = 7.1 Hz, 2H), 6.20 (bs, 1H), 11.18 (bs, 1H) ppm,  $^{13}C$  NMR (62.5 MHz,  $CDCl_3$ )  $\delta$  14.3, 23.4, 30.1, 60.1, 103.2, 167.3, 169.7, 197.0 ppm; HRMS (ESI) Cal. for ( $M^+ + H$ ): $C_8H_{14}NO_3$ : 172.0974. Found: 172.0979.

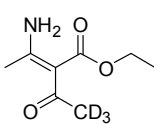 **1j**: Yield : 68 %,  $^1H$  NMR (250 MHz,  $CDCl_3$ )  $\delta$  1.33 (t,  $J$  = 7.1 Hz, 3H), 2.23 (s, 3H), 4.23 (q,  $J$  = 7.1 Hz, 2H), 5.99 (bs, 1H), 11.20 (bs, 1H) ppm;  $^{13}C$  NMR (62.5 MHz,  $CDCl_3$ )  $\delta$  14.2, 23.5, 60.1, 103.3, 167.2, 169.6, 197.2 ppm; HRMS (ESI) Cal. for ( $M^+ + H$ ): $C_8H_{11}D_3NO_3$ : 175.1159. Found: 175.1172.

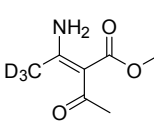 **1k**: Yield : 70 %,  $^1H$  NMR (250 MHz,  $CDCl_3$ )  $\delta$  1.33 (t,  $J$  = 7.1 Hz, 3H), 2.29 (s, 3H), 4.23 (q,  $J$  = 7.1 Hz, 2H), 6.82 (bs, 1H), 11.15 (bs, 1H) ppm;  $^{13}C$  NMR (62.5 MHz,  $CDCl_3$ )  $\delta$  14.1, 30.0, 60.0, 102.9, 167.7, 169.7, 196.8 ppm; HRMS (ESI) Cal. for ( $M^+ + H$ ): $C_8H_{11}D_3NO_3$ : 175.1159. Found: 175.1156.

**General Procedures for the Synthesis of Pyrazoles 2.** To a solution of **1a** (165 mg, 0.5 mmol) in absolute ethanol (1 mL) was added phenyl hydrazine (0.3 mL, 2.5 mmol) and *p*-toluenesulfonic acid (5 mg, 5 mol%) and stirred at room temperature for 1 h. The reaction mixture was refluxed for 1 h, and cooled to room temperature. After evaporation of solvent, the residue was dissolved in ethyl acetate, and organic layer was washed subsequently with sat'd  $NaHCO_3$ (aq), 1N  $HCl$ (aq), and brine, and then dried with anhydrous  $MgSO_4$ . After concentration under reduced pressure, the residue was purified by column chromatography on silica gel to afford the product **2a** (139 mg, 0.45 mmol, 91 %).

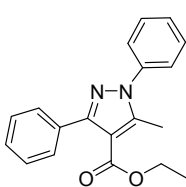 **2a**: Yield : 91 %,  $^1H$  NMR (250 MHz,  $CDCl_3$ )  $\delta$  1.22 (t,  $J$  = 7.1 Hz, 3H), 2.59 (s, 3H), 4.24 (q,  $J$  = 7.1 Hz, 2H), 7.38 ~ 7.51 (m, 8H), 7.65 ~ 7.69 (m, 2H) ppm;  $^{13}C$  NMR (62.5 MHz,  $CDCl_3$ )  $\delta$  12.8, 14.1, 60.0, 110.6,



125.8, 127.6, 128.2, 128.7, 129.2, 129.5, 133.1, 138.8, 144.8, 153.6, 164.2 ppm; HRMS (ESI) Cal. for ( $M^+ + H$ ): $C_{19}H_{19}N_2O_2$ : 307.1447. Found: 307.1457.

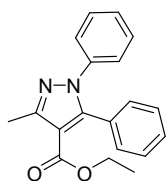

**2b**: Yield : 88 %,  $^1H$  NMR (250 MHz,  $CDCl_3$ )  $\delta$  1.13 (t,  $J = 7.1$  Hz, 3H), 2.60 (s, 3H), 4.15 (q,  $J = 7.1$  Hz, 2H), 7.15 ~ 7.34 (m, 10H) ppm;  $^{13}C$  NMR (62.5 MHz,  $CDCl_3$ )  $\delta$  14.0, 14.3, 59.8, 111.9, 125.3, 127.6, 127.9, 128.7, 128.8, 129.9, 130.4, 139.2, 146.3, 151.8, 163.8 ppm; HRMS (ESI) Cal. for ( $M^+ + H$ ): $C_{19}H_{19}N_2O_2$ : 307.1447. Found: 307.1457.

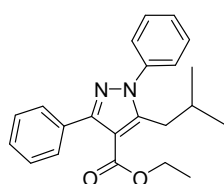

**2c**: Yield : 87 %,  $^1H$  NMR (250 MHz,  $CDCl_3$ )  $\delta$  0.78 (d,  $J = 6.7$  Hz, 6H), 1.21 (t,  $J = 7.0$  Hz, 3H), 1.89 ~ 1.83 (m, 1H), 2.92 (d,  $J = 7.3$  Hz, 2H), 4.23 (q,  $J = 7.1$  Hz, 2H), 7.36 ~ 7.49 (m, 8H), 7.65 ~ 7.69 (m, 2H) ppm;  $^{13}C$  NMR (62.5 MHz,  $CDCl_3$ )  $\delta$  13.9, 22.2, 28.9, 33.8, 59.9, 110.2, 126.7, 127.6, 128.1, 128.8, 129.2, 129.4, 133.1, 139.1, 148.5, 153.5, 164.2 ppm; HRMS (ESI) Cal. for ( $M^+ + H$ ): $C_{22}H_{25}N_2O_2$ : 349.1916. Found: 349.1909.

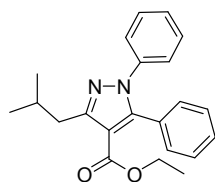

**2d**: Yield : 85 %,  $^1H$  NMR (250 MHz,  $CDCl_3$ )  $\delta$  1.03 (d,  $J = 6.6$  Hz, 6H), 1.12 (t,  $J = 7.1$  Hz, 3H), 2.10 ~ 2.20 (m, 1H), 2.89 (d,  $J = 7.1$  Hz, 2H), 4.14 (q,  $J = 7.1$  Hz, 2H), 7.17 ~ 7.33 (m, 10H) ppm;  $^{13}C$  NMR (62.5 MHz,  $CDCl_3$ )  $\delta$  13.9, 22.6, 28.5, 36.9, 59.8, 111.7, 125.3, 127.5, 127.8, 128.7, 130.1, 130.4, 139.2, 146.3, 154.8, 163.9 ppm; HRMS (ESI) Cal. for ( $M^+ + H$ ): $C_{22}H_{25}N_2O_2$ : 349.1916. Found: 349.1923.

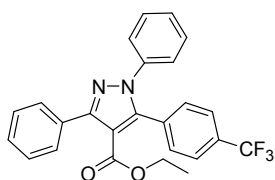

**2e**: Yield : 83 %,  $^1H$  NMR (250 MHz,  $CDCl_3$ )  $\delta$  0.97 (t,  $J = 7.1$  Hz, 3H), 4.08 (q,  $J = 7.1$  Hz, 2H), 7.22 ~ 7.48 (m, 10H), 7.60 (d,  $J = 8.1$  Hz, 2H), 7.75 ~ 7.79 (m, 2H) ppm;  $^{13}C$  NMR (62.5 MHz,  $CDCl_3$ )  $\delta$  13.6, 60.4, 112.5, 124.9, 125.1, 125.5, 127.9, 128.3, 128.6, 129.1, 129.3, 131.0, 132.4, 133.3, 138.7, 144.8, 153.6, 163.4 ppm; HRMS (ESI) Cal. for ( $M^+ + H$ ): $C_{25}H_{20}F_3N_2O_2$ : 437.1477. Found: 437.1455.

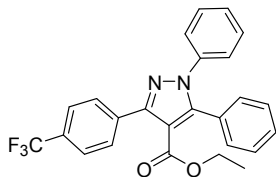

**2f**: Yield : 88 %,  $^1H$  NMR (250 MHz,  $CDCl_3$ )  $\delta$  0.96 (t,  $J = 7.1$  Hz, 3H), 4.08 (q,  $J = 7.1$  Hz, 2H), 7.25 ~ 7.39 (m, 10H), 7.70 (d,  $J = 8.2$  Hz, 2H), 7.93 (d,  $J = 8.0$  Hz, 2H) ppm;  $^{13}C$  NMR (62.5 MHz,  $CDCl_3$ )  $\delta$  13.6, 60.4, 112.2, 124.7, 124.8, 124.9, 125.4, 128.1, 129.0, 129.2, 129.4, 129.6, 130.4, 136.4, 139.0, 146.7, 152.0, 162.9 ppm; HRMS (ESI) Cal. for ( $M^+ + H$ ): $C_{25}H_{20}F_3N_2O_2$ : 437.1477. Found: 437.1498.

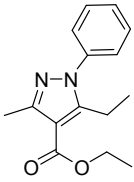 **2g**: Yield : 91 %,  $^1\text{H}$  NMR (250 MHz,  $\text{CDCl}_3$ )  $\delta$  1.17 (t,  $J$  = 7.4 Hz, 3H), 1.39 (t,  $J$  = 7.1 Hz, 3H), 2.50 (s, 3H), 2.90 (q,  $J$  = 7.4 Hz, 2H), 4.34 (q,  $J$  = 7.1 Hz, 2H), 7.36 ~ 7.50 (m, 5H) ppm;  $^{13}\text{C}$  NMR (62.5 MHz,  $\text{CDCl}_3$ )  $\delta$  13.7, 14.3, 19.1, 59.7, 109.7, 126.1, 128.7, 129.2, 138.9, 150.4, 151.5, 164.3 ppm; HRMS (ESI) Cal. for ( $\text{M}^+$ +H): $\text{C}_{15}\text{H}_{19}\text{N}_2\text{O}_2$ : 259.1447. Found: 259.1435.

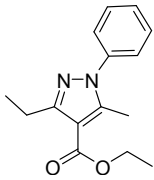 **2h**: Yield : 90 %,  $^1\text{H}$  NMR (250 MHz,  $\text{CDCl}_3$ )  $\delta$  1.29 (t,  $J$  = 7.6 Hz, 3H), 1.39 (t,  $J$  = 7.1 Hz, 3H), 2.52 (s, 3H), 2.94 (q,  $J$  = 7.1 Hz, 2H), 4.34 (q,  $J$  = 7.1 Hz, 2H), 7.27 ~ 7.50 (m, 5H) ppm;  $^{13}\text{C}$  NMR (62.5 MHz,  $\text{CDCl}_3$ )  $\delta$  12.6, 13.5, 14.3, 21.7, 59.6, 110.0, 125.6, 128.3, 129.1, 138.8, 144.4, 156.6, 164.3 ppm; HRMS (ESI) Cal. for ( $\text{M}^+$ +H): $\text{C}_{15}\text{H}_{19}\text{N}_2\text{O}_2$ : 259.1447. Found: 259.1438.

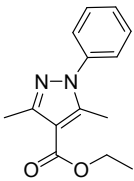 **2i**: Yield : 97 %,  $^1\text{H}$  NMR (250 MHz,  $\text{CDCl}_3$ )  $\delta$  1.38 (t,  $J$  = 7.1 Hz, 3H), 2.50 (s, 3H), 2.52 (s, 3H), 4.33 (q,  $J$  = 7.1 Hz, 2H), 7.37 ~ 7.49 (m, 5H) ppm;  $^{13}\text{C}$  NMR (62.5 MHz,  $\text{CDCl}_3$ )  $\delta$  12.6, 14.3, 14.4, 59.7, 110.8, 125.6, 128.4, 129.2, 138.8, 144.5, 151.3, 164.6 ppm; HRMS (ESI) Cal. for ( $\text{M}^+$ +H): $\text{C}_{14}\text{H}_{17}\text{N}_2\text{O}_2$ : 245.1290. Found: 245.1311.

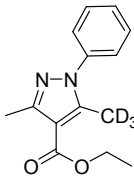 **2j**: Yield : 79 %,  $^1\text{H}$  NMR (250 MHz,  $\text{CDCl}_3$ )  $\delta$  1.38 (t,  $J$  = 7.1 Hz, 3H), 2.50 (s, 3H), 4.33 (q,  $J$  = 7.1 Hz, 2H), 7.27 ~ 7.49 (m, 5H) ppm;  $^{13}\text{C}$  NMR (62.5 MHz,  $\text{CDCl}_3$ )  $\delta$  14.36, 14.43, 59.7, 110.9, 125.6, 128.4, 129.2, 138.8, 144.4, 151.5, 164.6 ppm; HRMS (ESI) Cal. for ( $\text{M}^+$ +H): $\text{C}_{14}\text{H}_{14}\text{D}_3\text{N}_2\text{O}_2$ : 248.1475. Found: 248.1493.

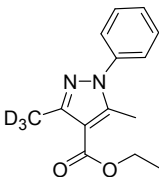 **2k**: Yield : 78 %,  $^1\text{H}$  NMR (250 MHz,  $\text{CDCl}_3$ )  $\delta$  1.38 (t,  $J$  = 7.1 Hz, 3H), 2.52 (s, 3H), 4.33 (q,  $J$  = 7.1 Hz, 2H), 7.38 ~ 7.51 (m, 5H) ppm;  $^{13}\text{C}$  NMR (62.5 MHz,  $\text{CDCl}_3$ )  $\delta$  12.6, 14.4, 59.7, 110.8, 125.6, 128.4, 129.2, 138.7, 144.4, 151.3, 164.5 ppm; HRMS (ESI) Cal. for ( $\text{M}^+$ +H): $\text{C}_{14}\text{H}_{14}\text{D}_3\text{N}_2\text{O}_2$ : 248.1475. Found: 248.1485.

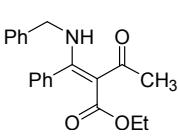 **3**: Yield : 64 %,  $^1\text{H}$  NMR (250 MHz,  $\text{CDCl}_3$ )  $\delta$  0.70 (t,  $J$  = 7.2 Hz, 3H), 2.35 (s, 3H), 3.67 (q,  $J$  = 7.2 Hz, 2H), 4.23 (d,  $J$  = 6.2 Hz), 7.10 ~ 7.13 (m, 2H), 7.20 ~ 7.40 (m, 8H), 12.57 (bs, 1H) ppm;  $^{13}\text{C}$  NMR (62.5 MHz,  $\text{CDCl}_3$ )  $\delta$  13.38, 29.30, 48.44, 59.93, 104.75, 126.91, 127.30, 127.58, 128.40, 128.75, 129.31, 134.10, 137.37, 167.97, 169.71, 196.36 ppm.

**Table S1-1. Crystal data for 2a (CCDS 708928)**

|                                   |                                             |                           |
|-----------------------------------|---------------------------------------------|---------------------------|
| Empirical formula                 | C19 H18 N2 O2                               |                           |
| Formula weight                    | 306.35                                      |                           |
| Temperature                       | 170(2) K                                    |                           |
| Wavelength                        | 0.71073 Å                                   |                           |
| Crystal system                    | Monoclinic                                  |                           |
| Space group                       | P2(1)/c                                     |                           |
| Unit cell dimensions              | a = 8.2775(12) Å                            | $\alpha = 90.00^\circ$    |
|                                   | b = 15.616(2) Å                             | $\beta = 98.896(3)^\circ$ |
|                                   | c = 12.3892(18) Å                           | $\gamma = 90.00^\circ$    |
| Volume                            | 1582.2(4) Å <sup>3</sup>                    |                           |
| Z                                 | 4                                           |                           |
| Density (calculated)              | 1.286 Mg/m <sup>3</sup>                     |                           |
| Absorption coefficient            | 0.084 mm <sup>-1</sup>                      |                           |
| F(000)                            | 648                                         |                           |
| Crystal size                      | 0.13 x 0.08 x 0.08 mm <sup>3</sup>          |                           |
| Theta range for data collection   | 2.11 to 26.00 .                             |                           |
| Index ranges                      | -9 ≤ h ≤ 10, -19 ≤ k ≤ 19, -12 ≤ l ≤ 15     |                           |
| Reflections collected             | 8739                                        |                           |
| Independent reflections           | 3094 [R(int) = 0.0571]                      |                           |
| Completeness to theta = 26.00     | 99.5 %                                      |                           |
| Absorption correction             | None                                        |                           |
| Refinement method                 | Full-matrix least-squares on F <sup>2</sup> |                           |
| Data / restraints / parameters    | 3094 / 0 / 211                              |                           |
| Goodness-of-fit on F <sup>2</sup> | 0.885                                       |                           |
| Final R indices [I>2sigma(I)]     | R1 = 0.0421, wR2 = 0.0862                   |                           |
| R indices (all data)              | R1 = 0.0793, wR2 = 0.0943                   |                           |
| Extinction coefficient            | 0.0065(10)                                  |                           |
| Largest diff. peak and hole       | 0.176 and -0.157 e.Å <sup>-3</sup>          |                           |

**Table S2. Crystal data for 2b (CCDS 708929).**

|                                   |                                                               |             |
|-----------------------------------|---------------------------------------------------------------|-------------|
| Empirical formula                 | C <sub>19</sub> H <sub>18</sub> N <sub>2</sub> O <sub>2</sub> |             |
| Formula weight                    | 306.35                                                        |             |
| Temperature                       | 293(2) K                                                      |             |
| Wavelength                        | 0.71073 Å                                                     |             |
| Crystal system                    | Monoclinic                                                    |             |
| Space group                       | P2(1)/n                                                       |             |
| Unit cell dimensions              | a = 10.468(8) Å                                               | α = 90.00°  |
|                                   | b = 15.676(12) Å                                              | β = 103.79° |
|                                   | c = 10.468(8) Å                                               | γ = 90.00°  |
| Volume                            | 1668(2) Å <sup>3</sup>                                        |             |
| Z                                 | 4                                                             |             |
| Density (calculated)              | 1.220 Mg/m <sup>3</sup>                                       |             |
| Absorption coefficient            | 0.080 mm <sup>-1</sup>                                        |             |
| F(000)                            | 648                                                           |             |
| Crystal size                      | 0.15 x 0.10 x 0.08 mm <sup>3</sup>                            |             |
| Theta range for data collection   | 2.39 to 25.99 .                                               |             |
| Index ranges                      | -12 ≤ h ≤ 12, -17 ≤ k ≤ 19, -9 ≤ l ≤ 12                       |             |
| Reflections collected             | 9153                                                          |             |
| Independent reflections           | 3264 [R(int) = 0.1063]                                        |             |
| Completeness to theta = 25.99     | 99.9 %                                                        |             |
| Absorption correction             | None                                                          |             |
| Refinement method                 | Full-matrix least-squares on F <sup>2</sup>                   |             |
| Data / restraints / parameters    | 3264 / 0 / 211                                                |             |
| Goodness-of-fit on F <sup>2</sup> | 0.681                                                         |             |
| Final R indices [I > 2σ(I)]       | R1 = 0.0587, wR2 = 0.1324                                     |             |
| R indices (all data)              | R1 = 0.1489, wR2 = 0.1464                                     |             |
| Extinction coefficient            | 0.017(2)                                                      |             |
| Largest diff. peak and hole       | 0.233 and -0.188 e.Å <sup>-3</sup>                            |             |

**Table S3. Crystal data for 2e(CCDS 708930).**

|                                   |                                                                              |                |
|-----------------------------------|------------------------------------------------------------------------------|----------------|
| Empirical formula                 | C <sub>25</sub> H <sub>19</sub> F <sub>3</sub> N <sub>2</sub> O <sub>2</sub> |                |
| Formula weight                    | 436.42                                                                       |                |
| Temperature                       | 170(2) K                                                                     |                |
| Wavelength                        | 0.71073 Å                                                                    |                |
| Crystal system                    | Monoclinic                                                                   |                |
| Space group                       | P2(1)/c                                                                      |                |
| Unit cell dimensions              | a = 12.182(2) Å                                                              | α = 90.00°     |
|                                   | b = 19.321(4) Å                                                              | β = 98.535(4)° |
|                                   | c = 9.0766(17) Å                                                             | γ = 90.00°     |
| Volume                            | 2112.7(7) Å <sup>3</sup>                                                     |                |
| Z                                 | 4                                                                            |                |
| Density (calculated)              | 1.372 Mg/m <sup>3</sup>                                                      |                |
| Absorption coefficient            | 0.106 mm <sup>-1</sup>                                                       |                |
| F(000)                            | 904                                                                          |                |
| Crystal size                      | 0.15 x 0.08 x 0.08 mm <sup>3</sup>                                           |                |
| Theta range for data collection   | 1.69 to 26.00 .                                                              |                |
| Index ranges                      | -15 ≤ h ≤ 15, -23 ≤ k ≤ 21, -11 ≤ l ≤ 10                                     |                |
| Reflections collected             | 11696                                                                        |                |
| Independent reflections           | 4139 [R(int) = 0.0557]                                                       |                |
| Completeness to theta = 26.00     | 99.7 %                                                                       |                |
| Absorption correction             | None                                                                         |                |
| Refinement method                 | Full-matrix least-squares on F <sup>2</sup>                                  |                |
| Data / restraints / parameters    | 4139 / 0 / 290                                                               |                |
| Goodness-of-fit on F <sup>2</sup> | 0.676                                                                        |                |
| Final R indices [I > 2σ(I)]       | R1 = 0.0341, wR2 = 0.0551                                                    |                |
| R indices (all data)              | R1 = 0.0749, wR2 = 0.0586                                                    |                |
| Largest diff. peak and hole       | 0.159 and -0.167 e.Å <sup>-3</sup>                                           |                |

**Table S4. Crystal data for 2f (CCDS 708931).**

|                                   |                                             |                |  |
|-----------------------------------|---------------------------------------------|----------------|--|
| Empirical formula                 | C25 H19 F3 N2 O2                            |                |  |
| Formula weight                    | 436.42                                      |                |  |
| Temperature                       | 170(2) K                                    |                |  |
| Wavelength                        | 0.71073 Å                                   |                |  |
| Crystal system                    | Triclinic                                   |                |  |
| Space group                       | P-1                                         |                |  |
| Unit cell dimensions              | a = 9.801(2) Å                              | α= 78.875(5)°  |  |
|                                   | b = 9.982(2) Å                              | β= 88.801(5)°  |  |
|                                   | c = 12.377(3) Å                             | γ = 64.005(4)° |  |
| Volume                            | 1065.2(4) Å <sup>3</sup>                    |                |  |
| Z                                 | 2                                           |                |  |
| Density (calculated)              | 1.361 Mg/m <sup>3</sup>                     |                |  |
| Absorption coefficient            | 0.105 mm <sup>-1</sup>                      |                |  |
| F(000)                            | 452                                         |                |  |
| Crystal size                      | 0.10 x 0.08 x 0.05 mm <sup>3</sup>          |                |  |
| Theta range for data collection   | 1.68 to 26.00 .                             |                |  |
| Index ranges                      | -12 ≤ h ≤ 12, -12 ≤ k ≤ 11, -10 ≤ l ≤ 15    |                |  |
| Reflections collected             | 5963                                        |                |  |
| Independent reflections           | 4052 [R(int) = 0.2207]                      |                |  |
| Completeness to theta = 26.00     | 96.8 %                                      |                |  |
| Absorption correction             | None                                        |                |  |
| Refinement method                 | Full-matrix least-squares on F <sup>2</sup> |                |  |
| Data / restraints / parameters    | 4052 / 0 / 291                              |                |  |
| Goodness-of-fit on F <sup>2</sup> | 0.714                                       |                |  |
| Final R indices [I>2sigma(I)]     | R1 = 0.0684, wR2 = 0.1151                   |                |  |
| R indices (all data)              | R1 = 0.2089, wR2 = 0.1613                   |                |  |
| Extinction coefficient            | 0.0067(14)                                  |                |  |
| Largest diff. peak and hole       | 0.345 and -0.398 e.Å <sup>-3</sup>          |                |  |

$^1\text{H}$  and  $^{13}\text{C}$  NMR spectra of **1a**

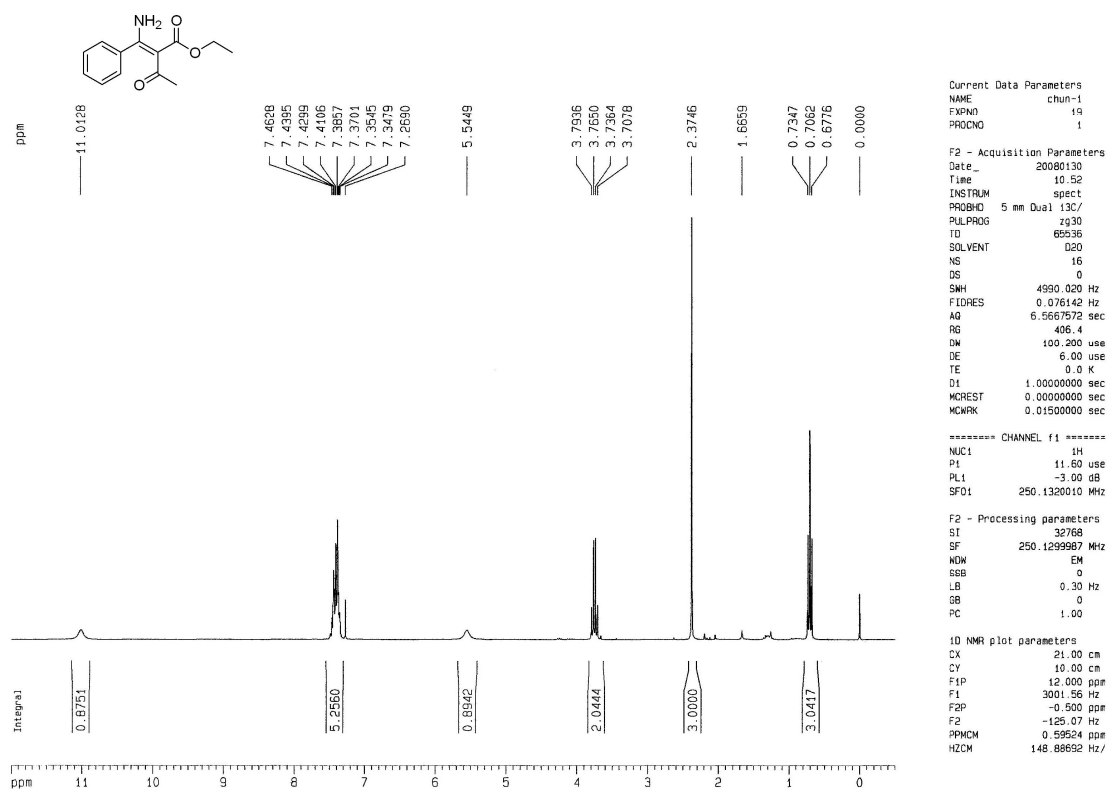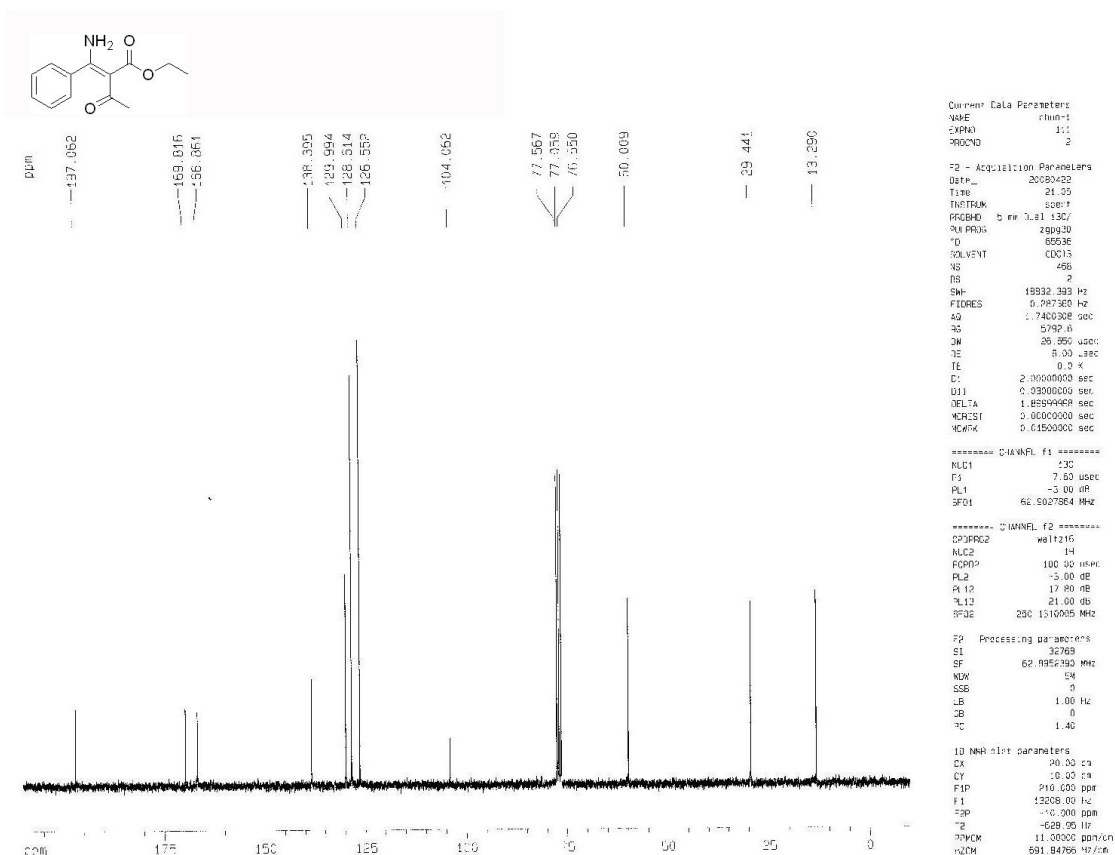

$^1\text{H}$  and  $^{13}\text{C}$  NMR spectra of **1b**

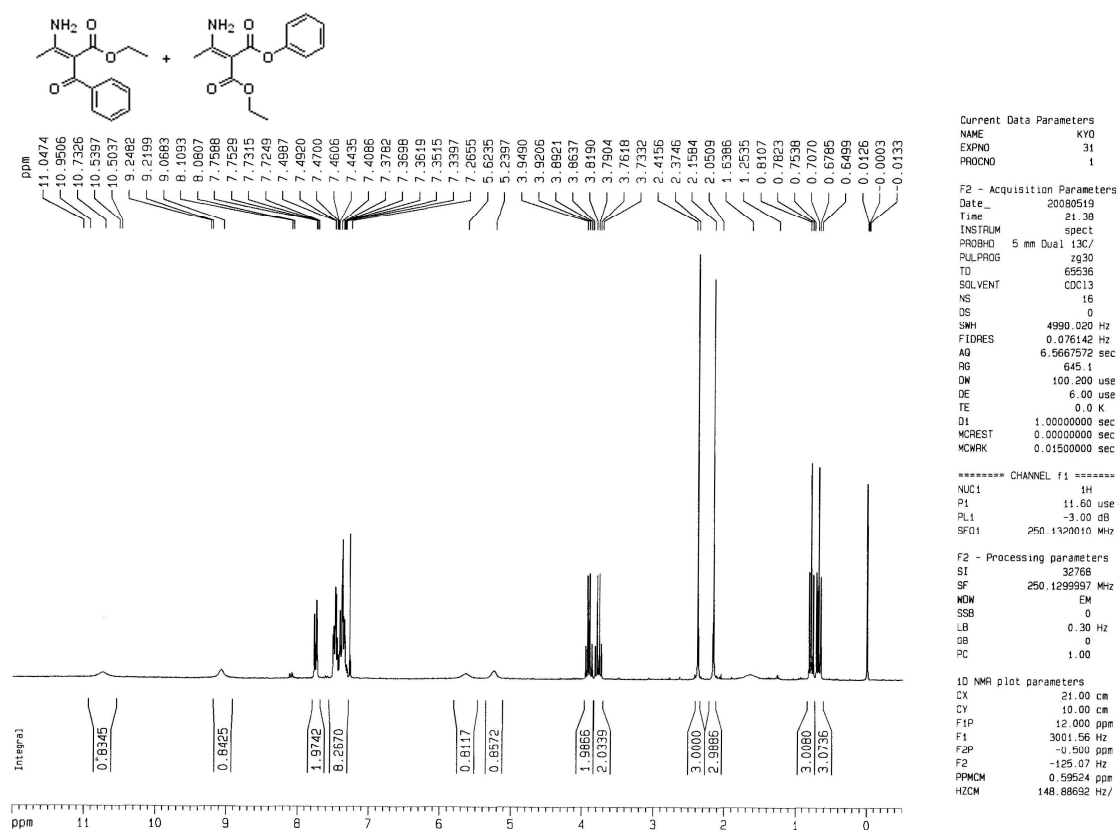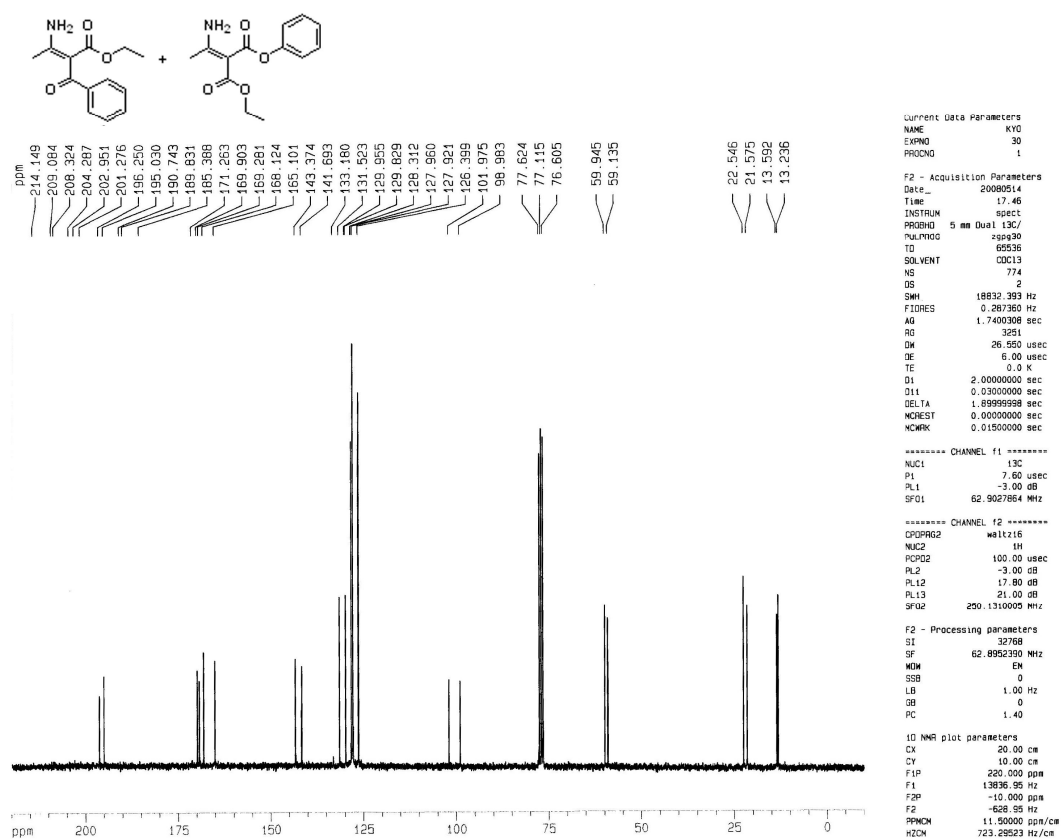



$^1\text{H}$  and  $^{13}\text{C}$  NMR spectra of **1c**

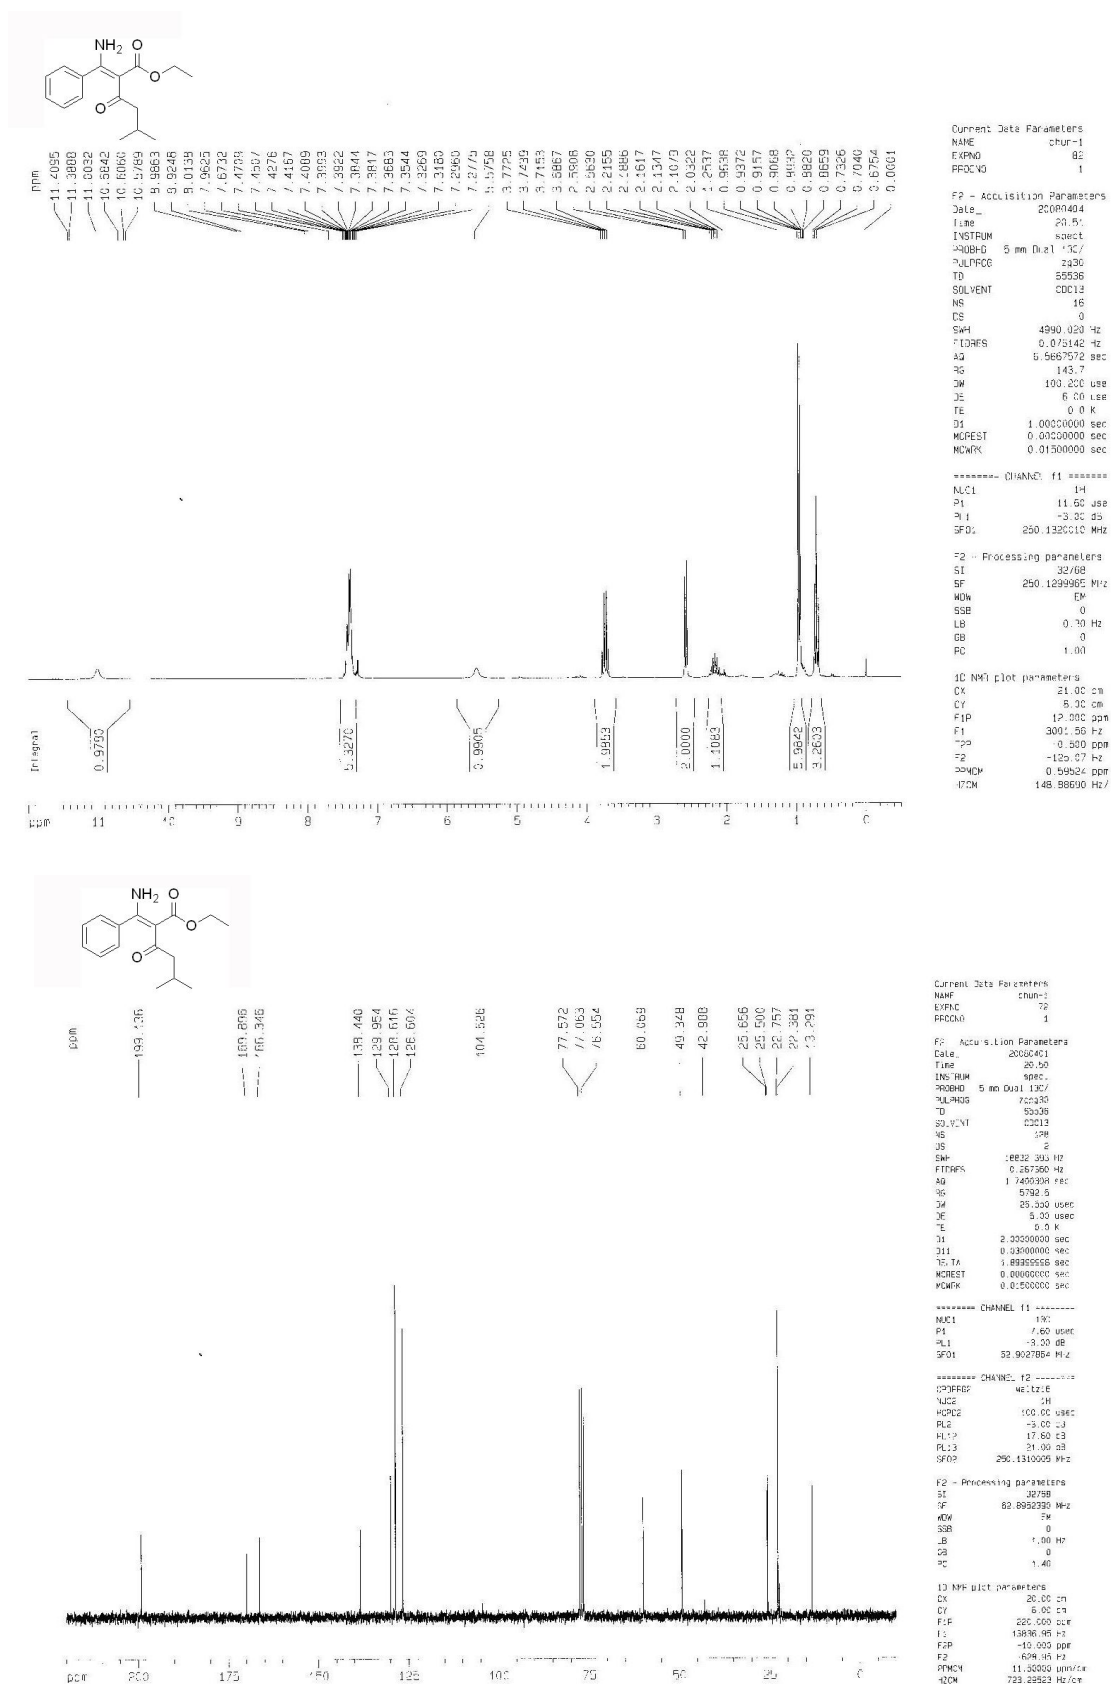

$^1\text{H}$  and  $^{13}\text{C}$  NMR spectra of **1d**

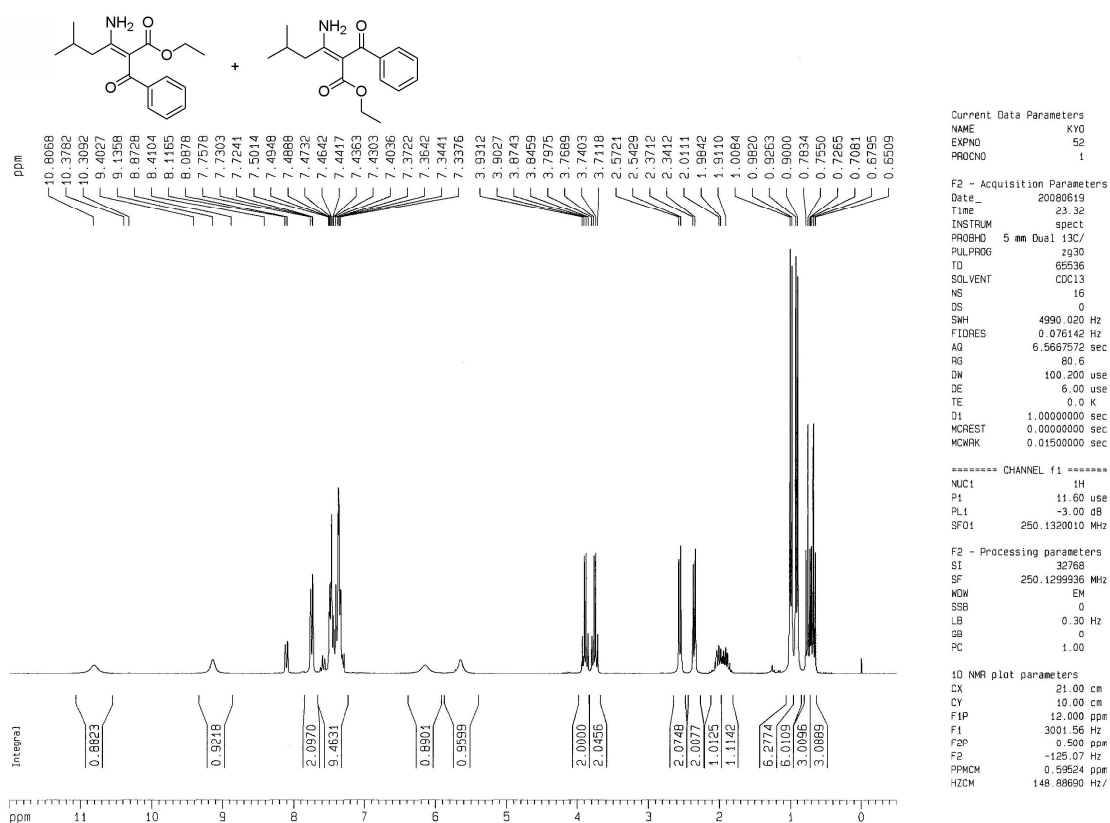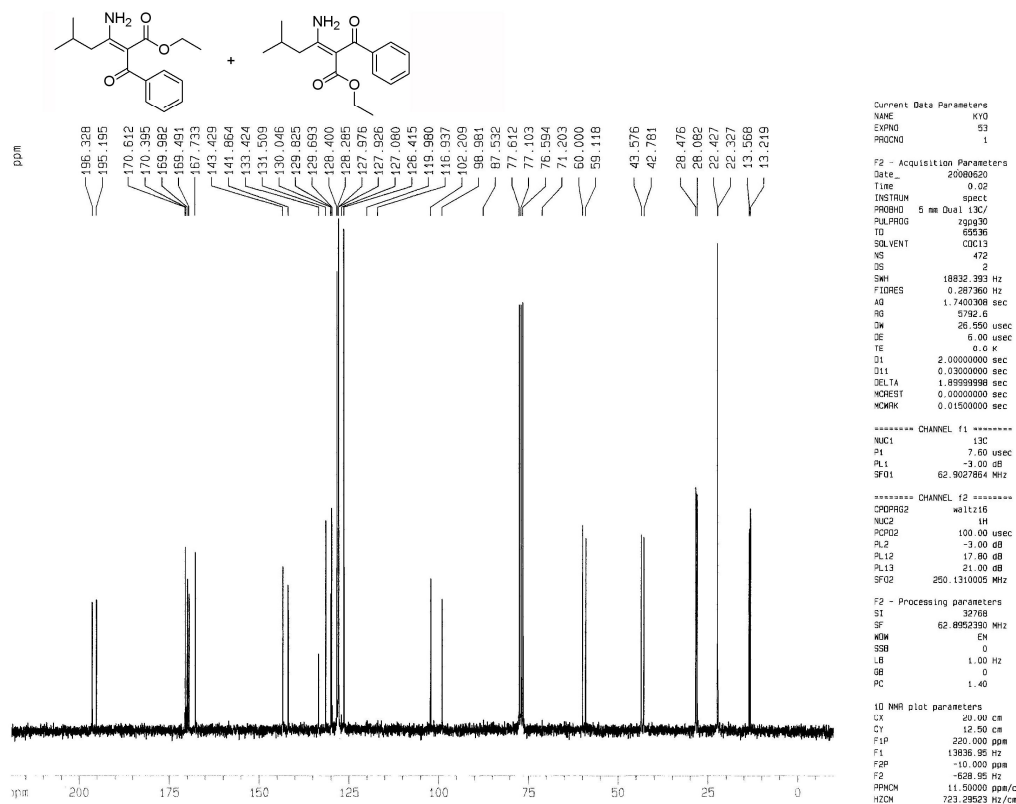

$^1\text{H}$  and  $^{13}\text{C}$  NMR spectra of **1e**

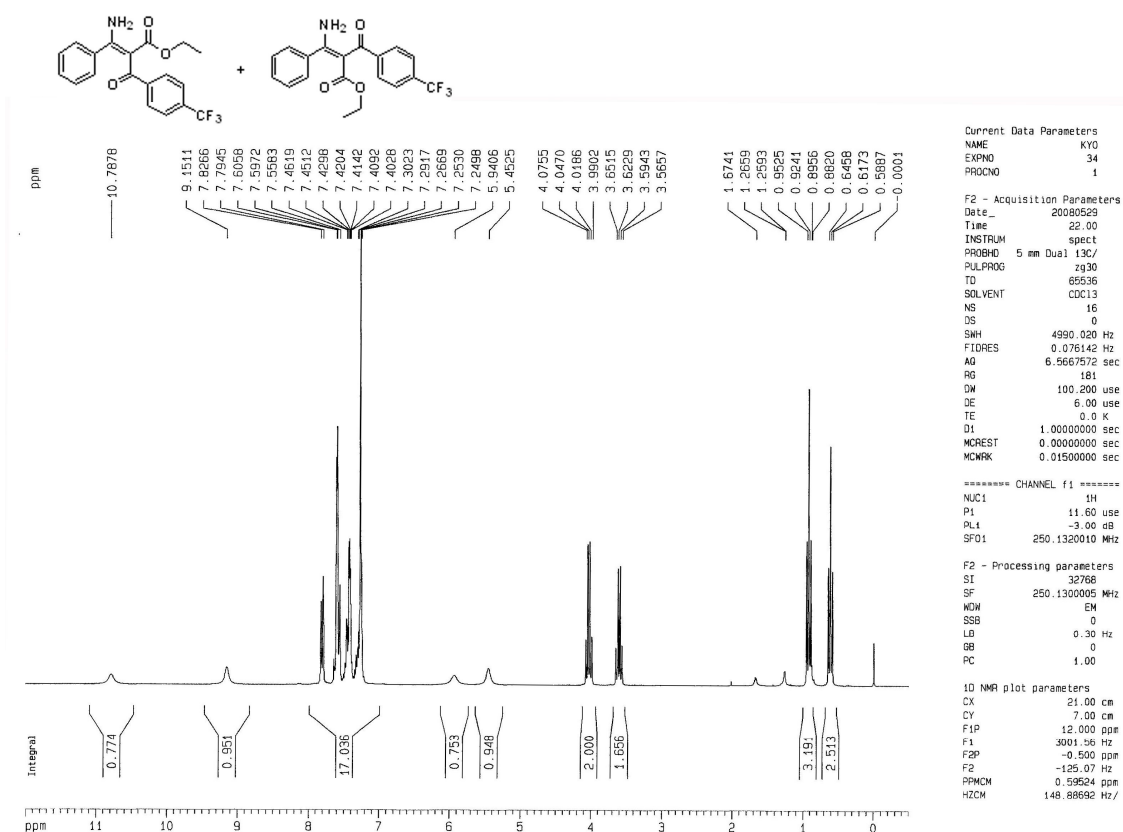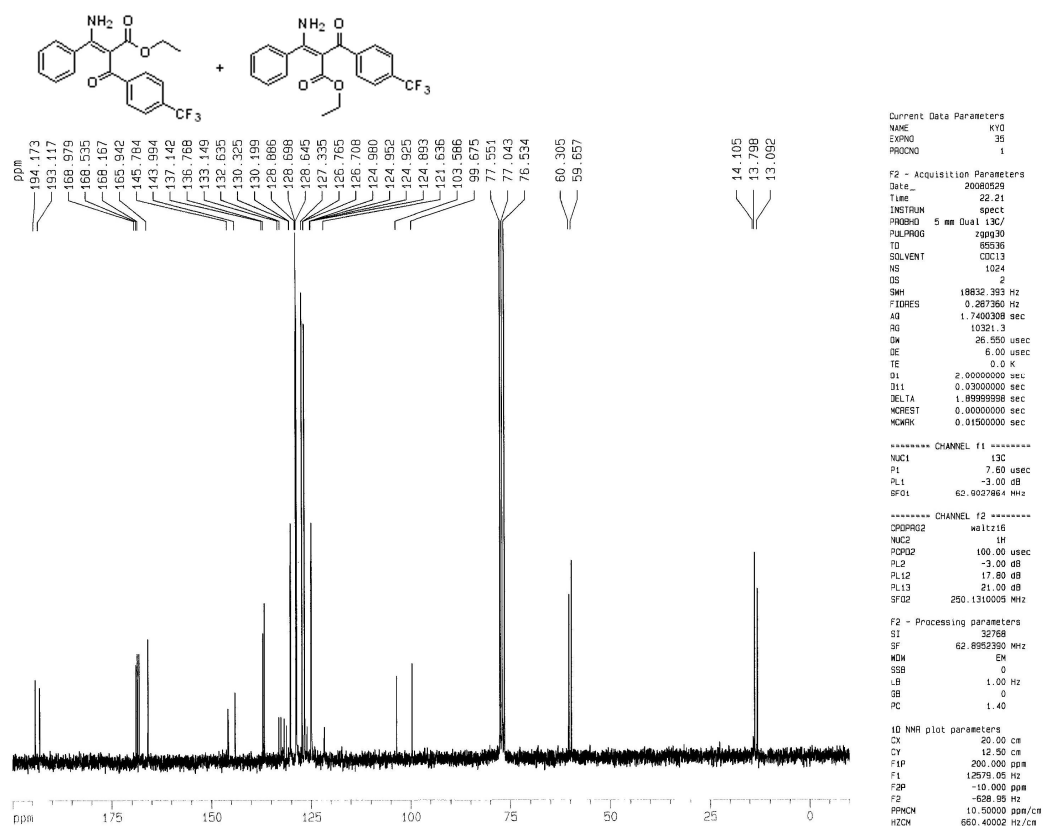

$^1\text{H}$  and  $^{13}\text{C}$  NMR spectra of **1f**

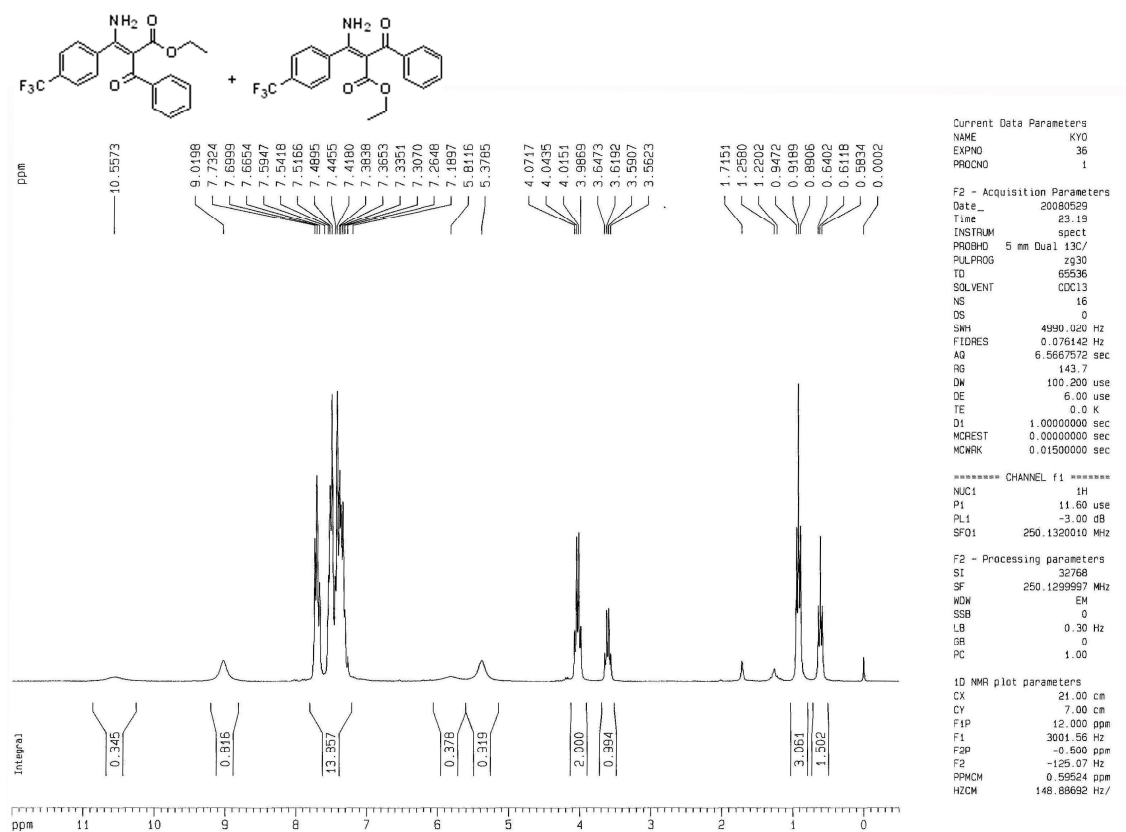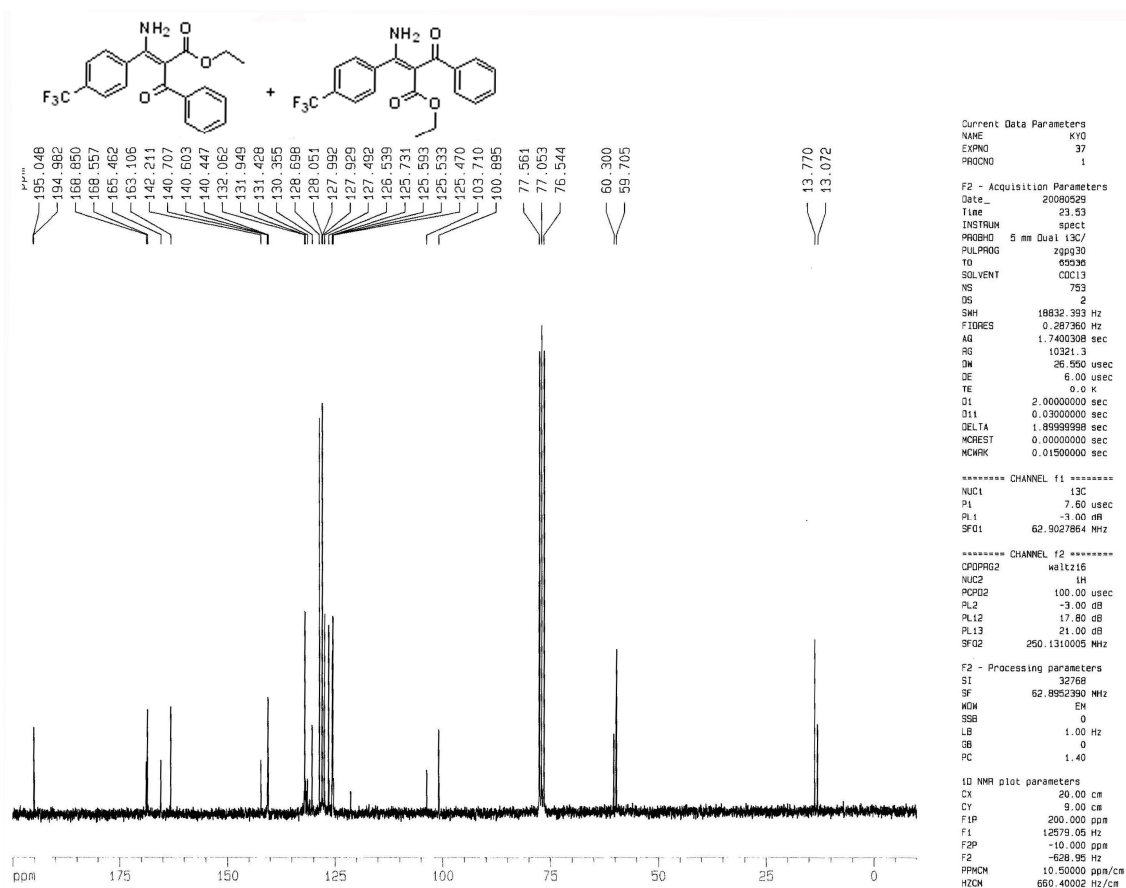

$^1\text{H}$  and  $^{13}\text{C}$  NMR spectra of **1g**

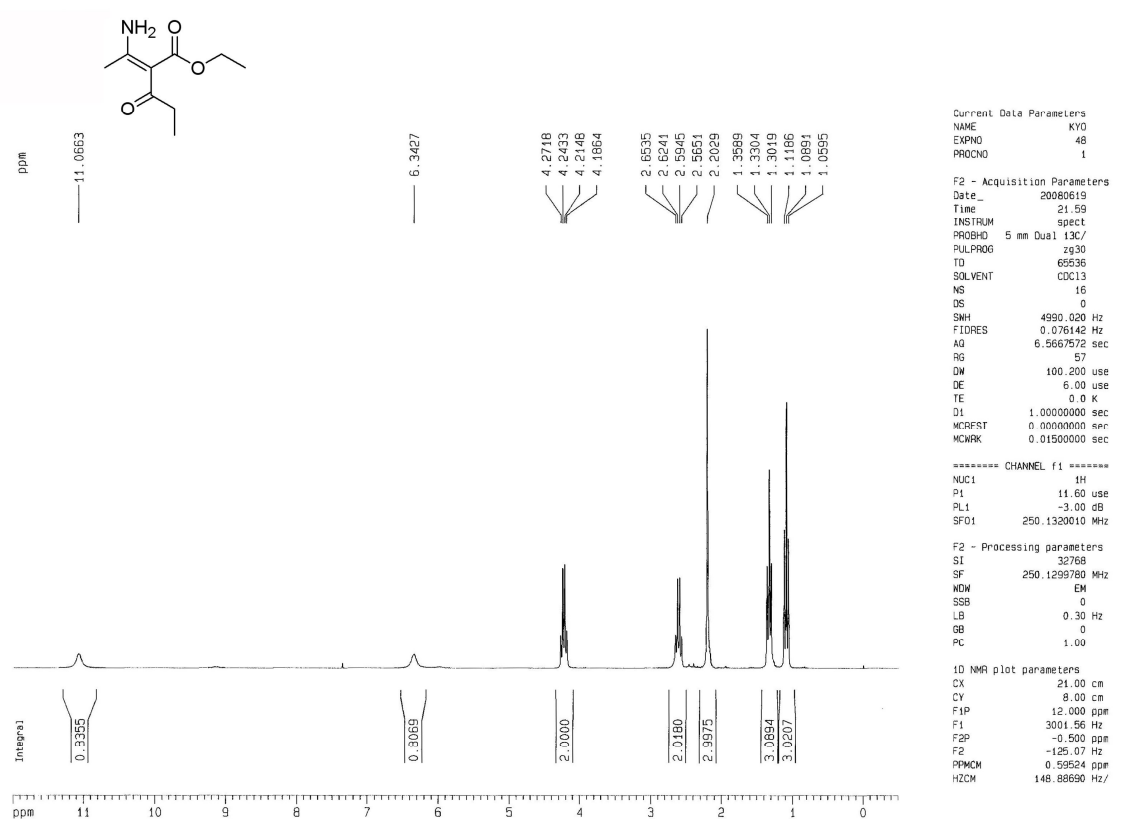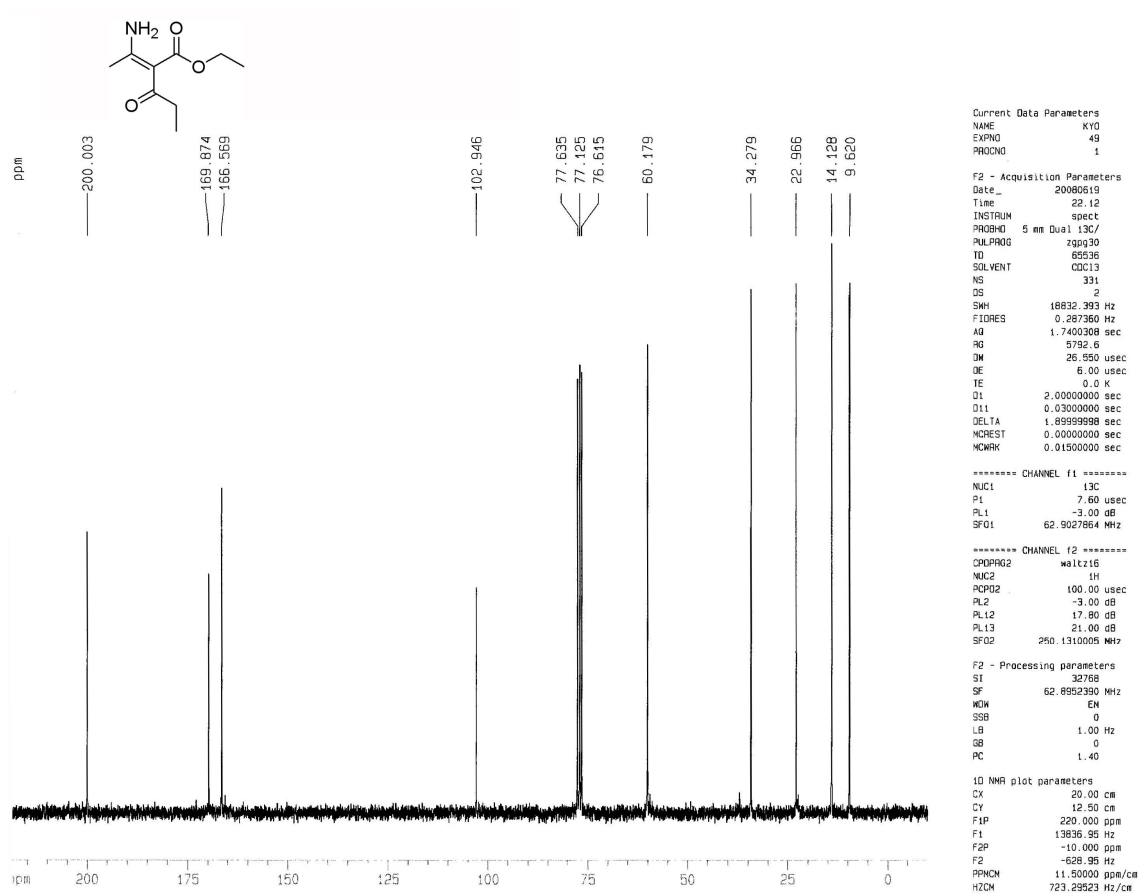

$^1\text{H}$  and  $^{13}\text{C}$  NMR spectra of **1h**

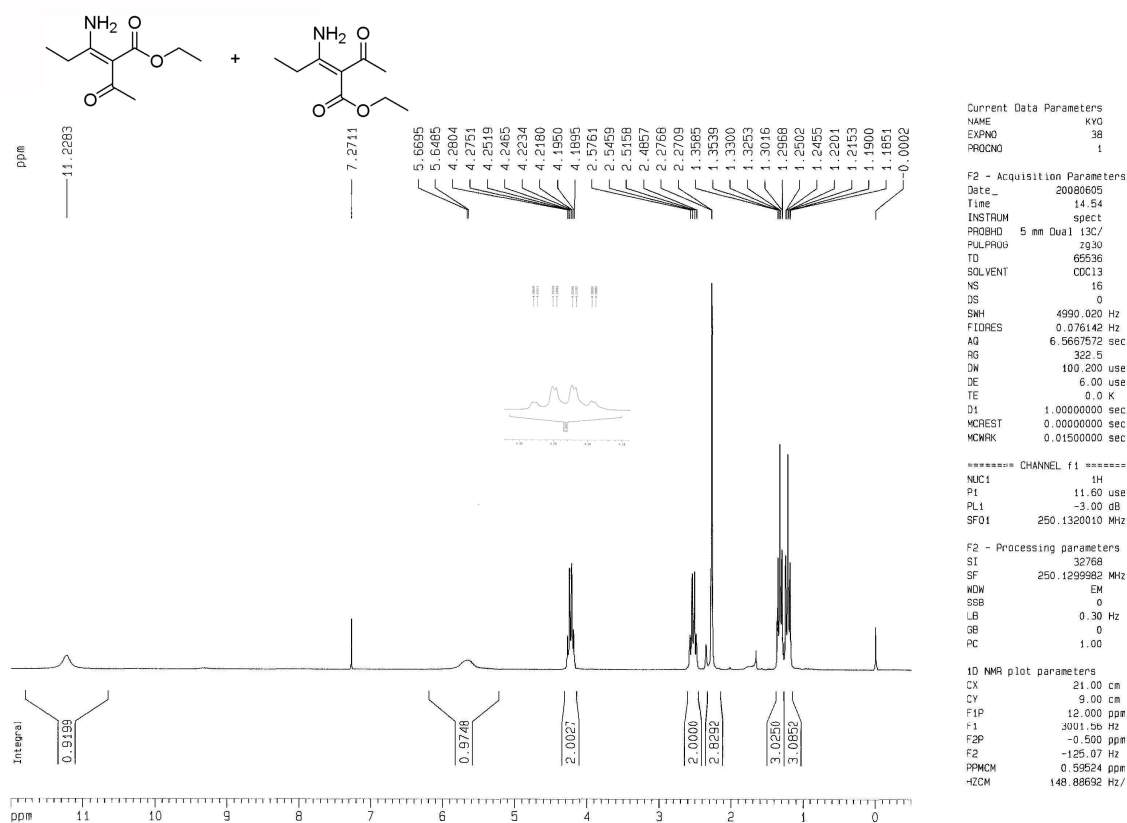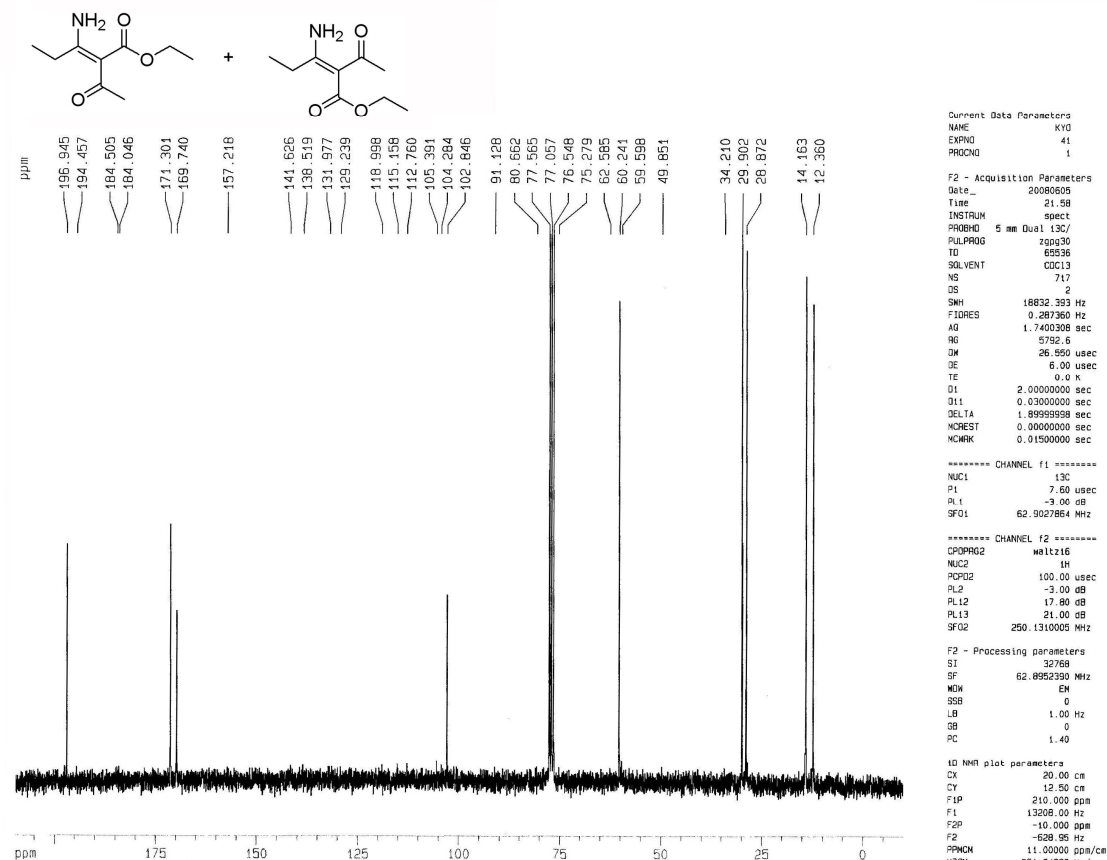

$^1\text{H}$  and  $^{13}\text{C}$  NMR spectra of **1i**

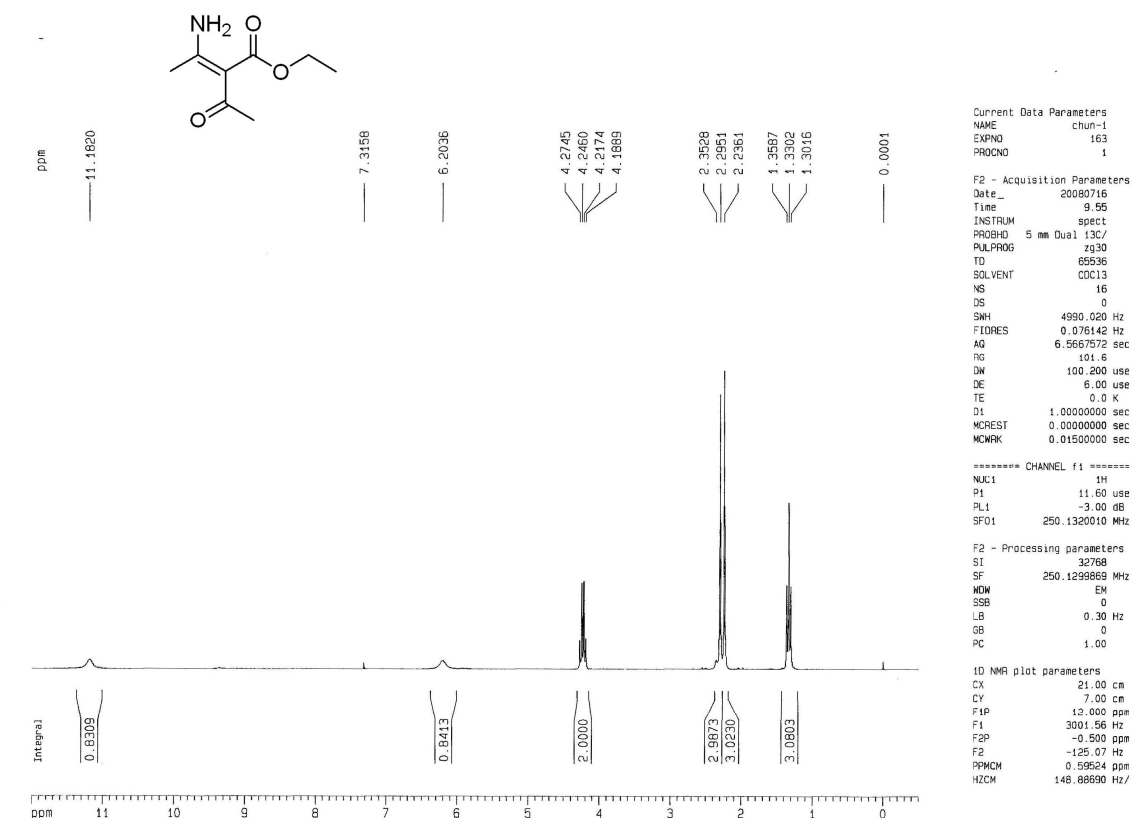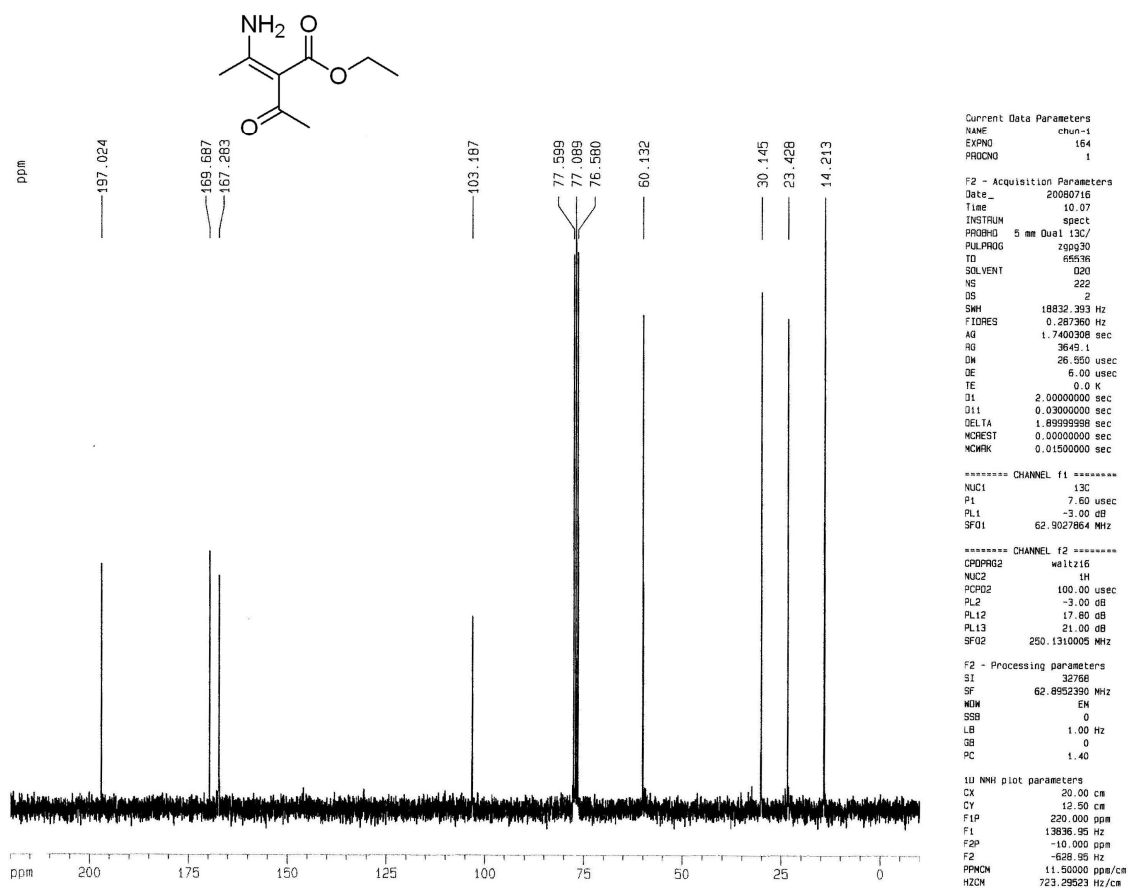

$^1\text{H}$  and  $^{13}\text{C}$  NMR spectra of **1j**

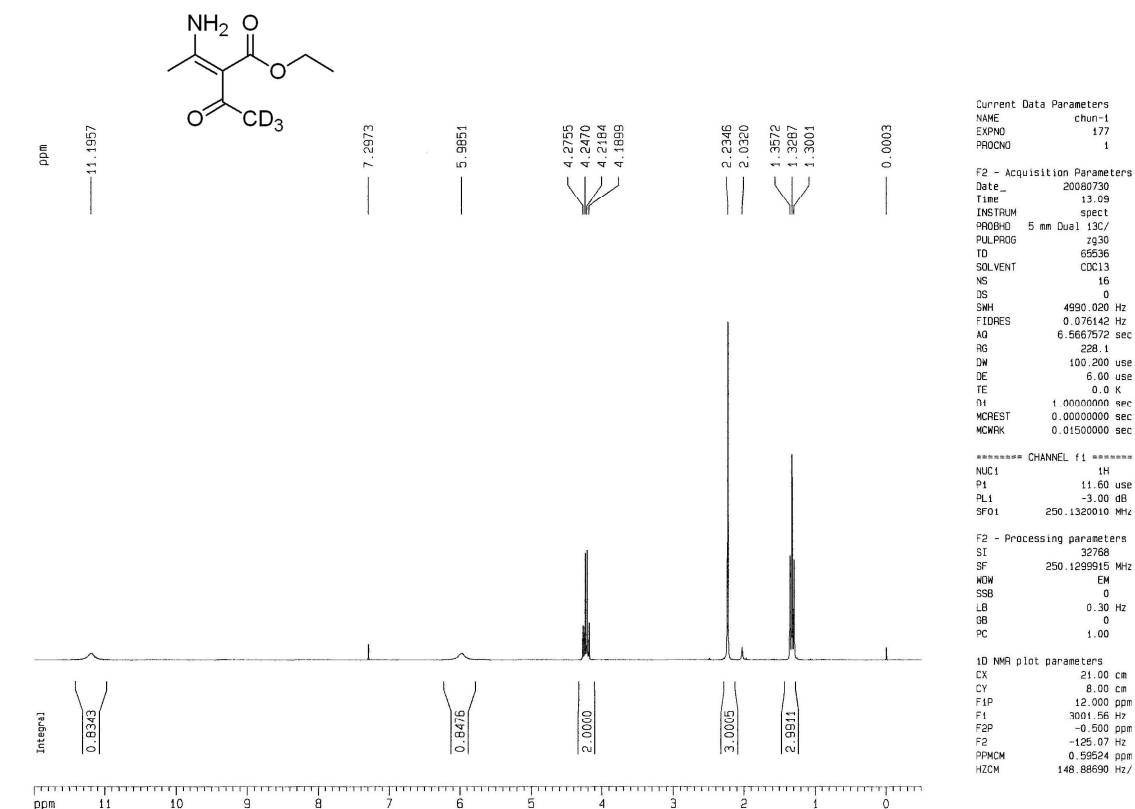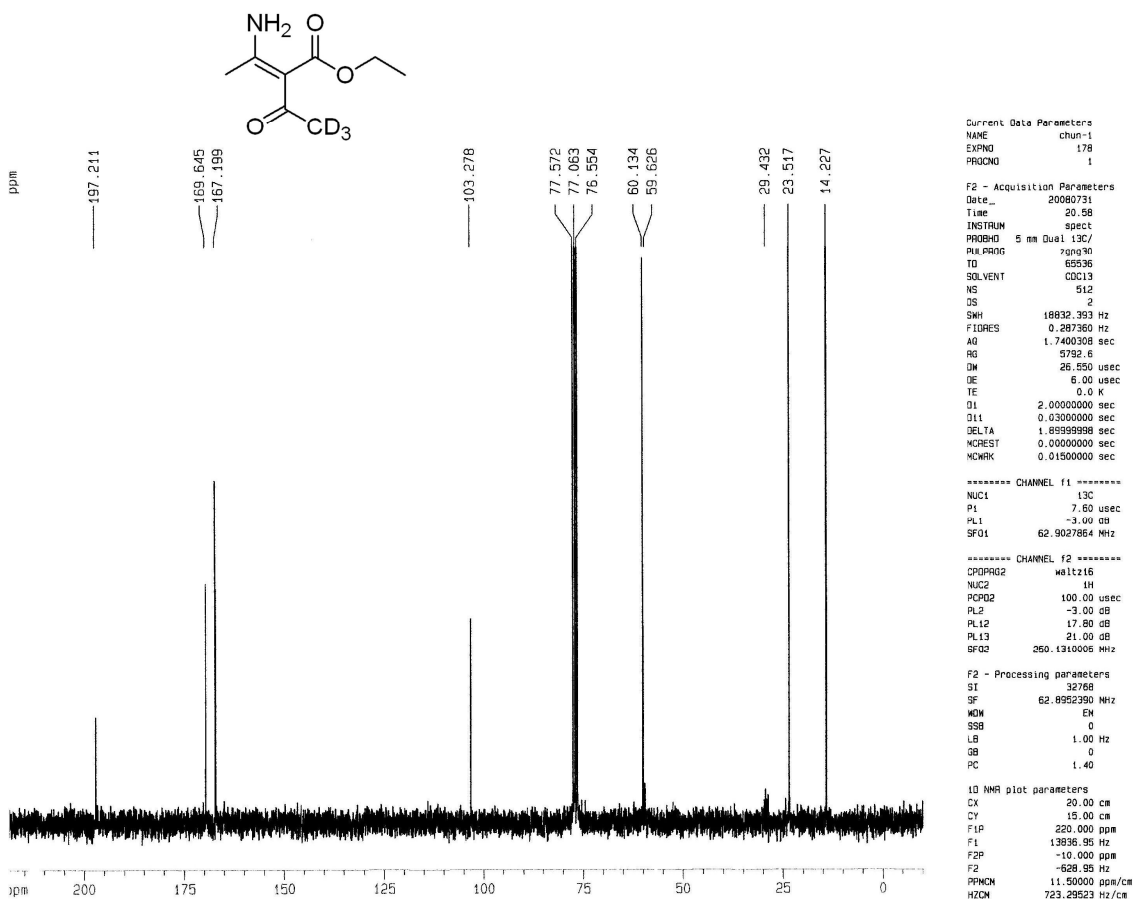



$^1\text{H}$  and  $^{13}\text{C}$  NMR spectra of **1k**

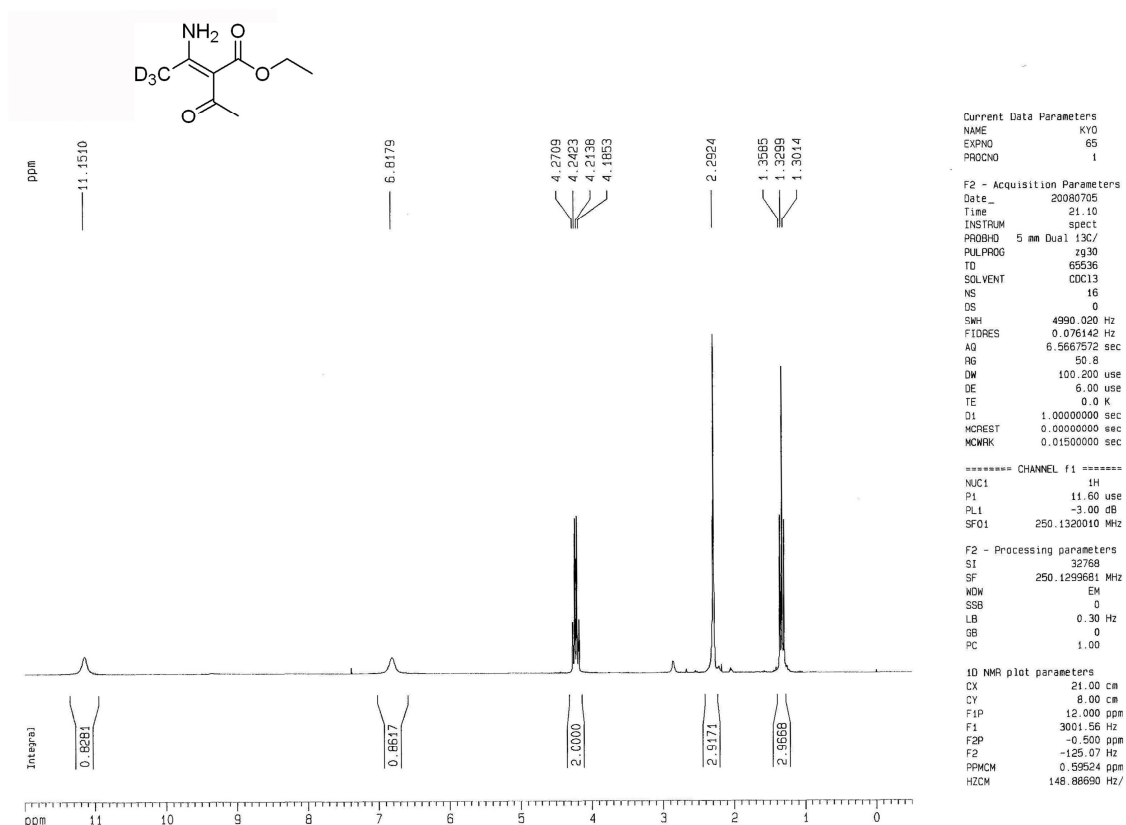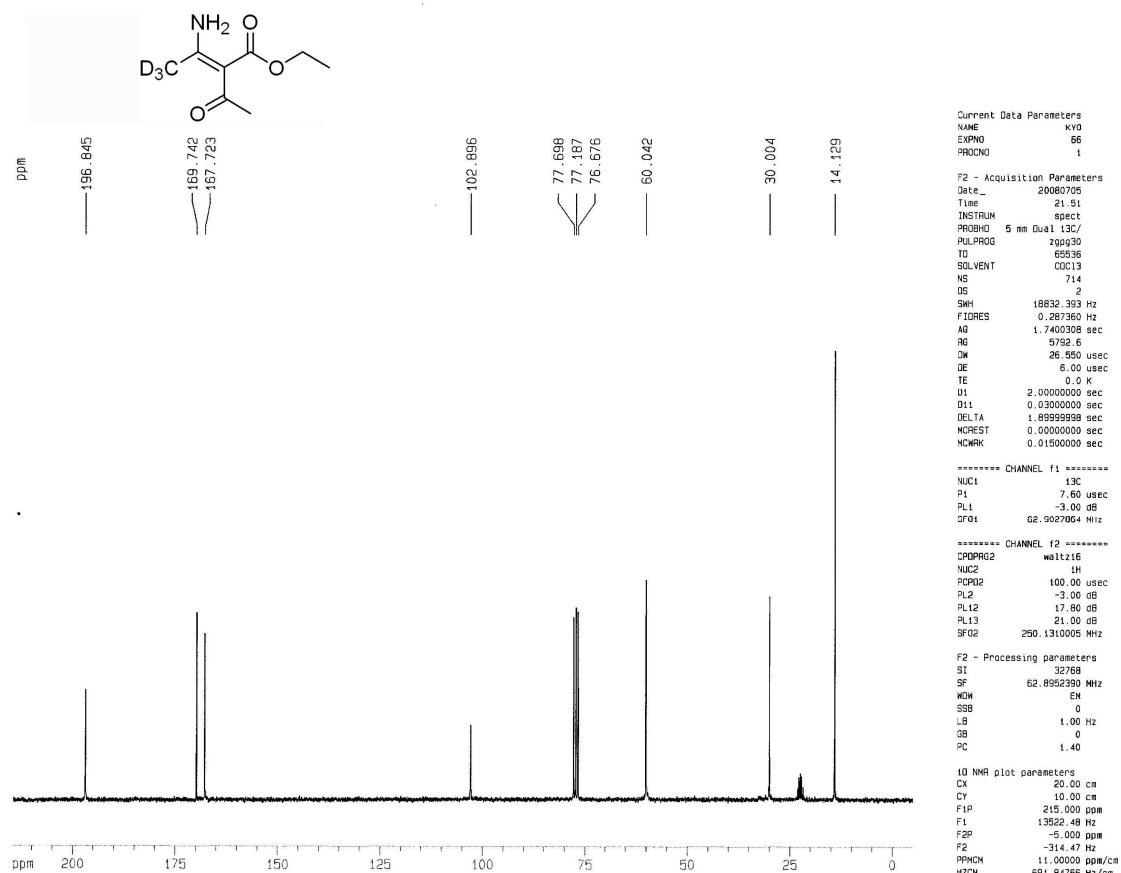

$^1\text{H}$  and  $^{13}\text{C}$  NMR spectra of **2a**

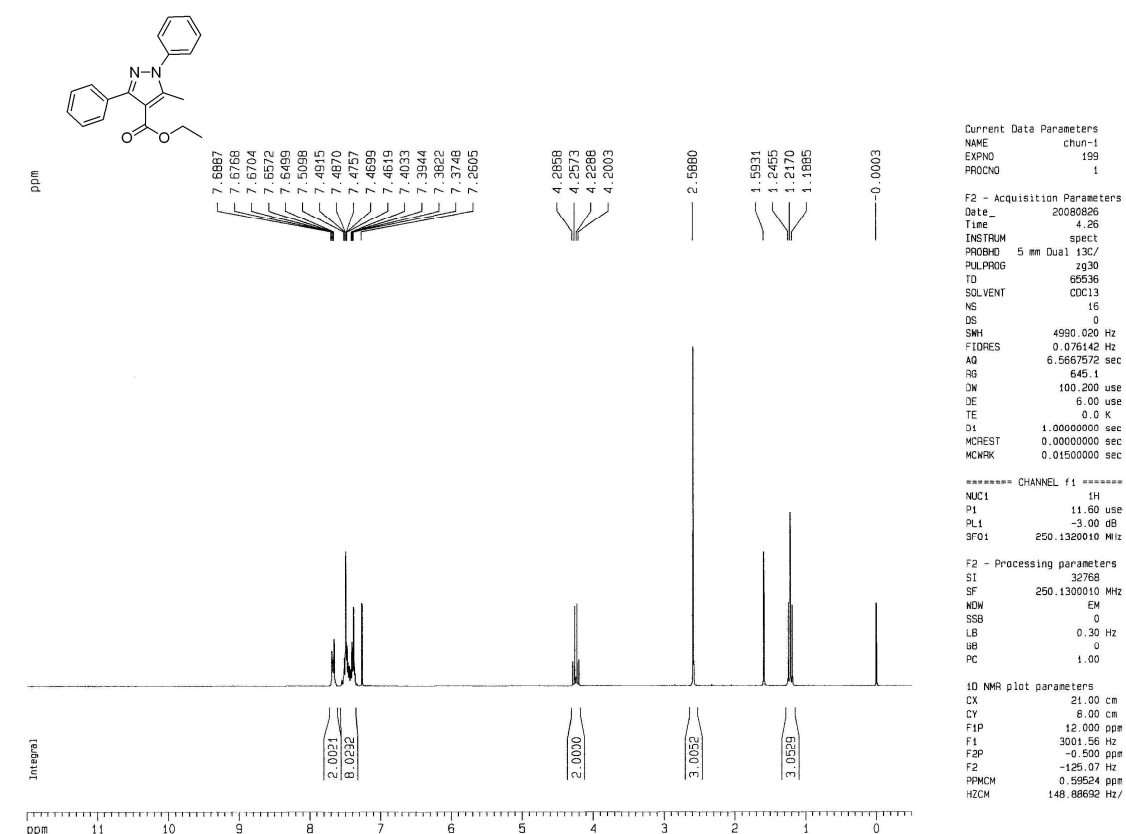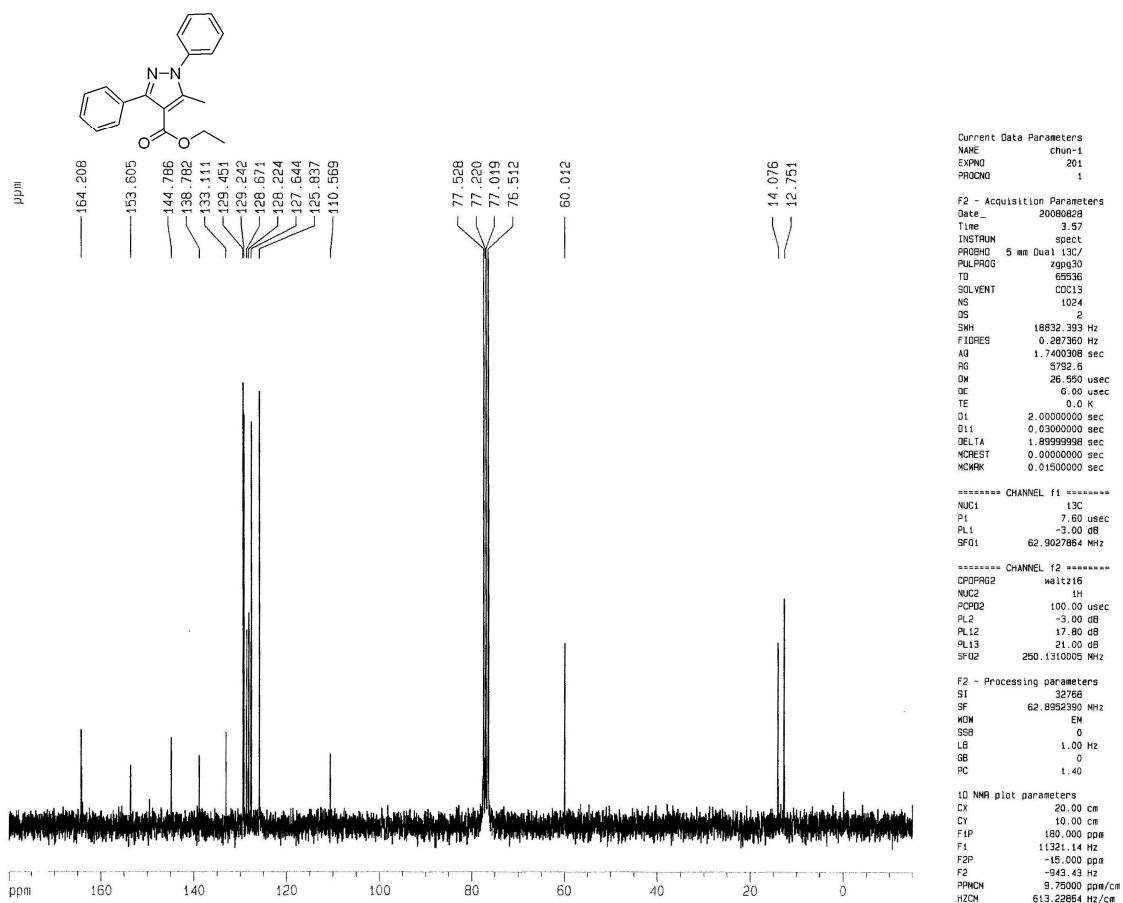

$^1\text{H}$  and  $^{13}\text{C}$  NMR spectra of 2b

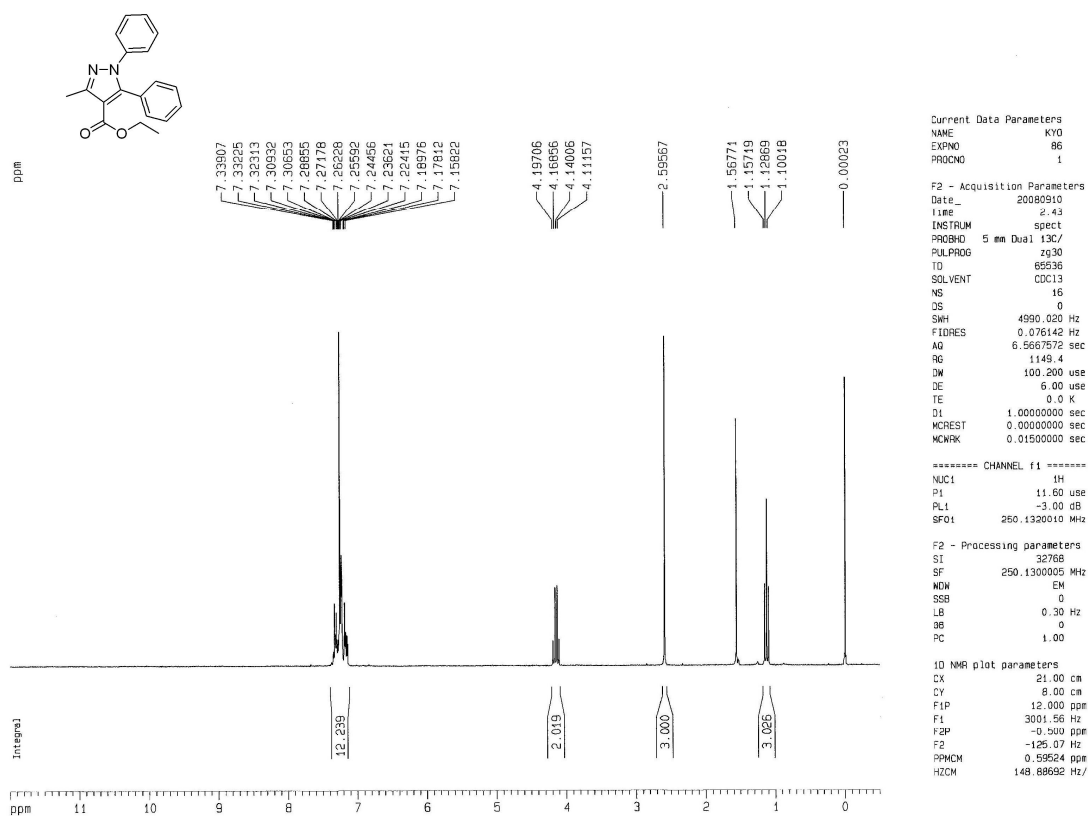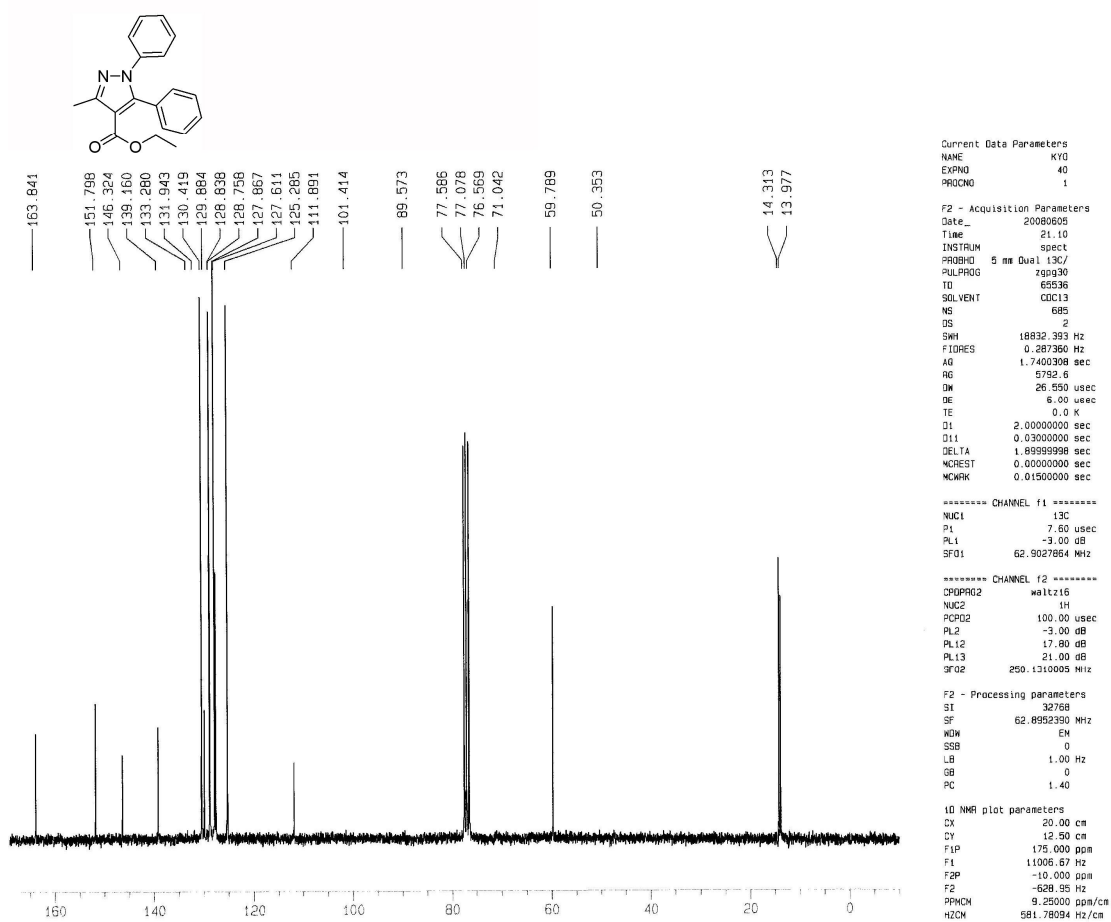

$^1\text{H}$  and  $^{13}\text{C}$  NMR spectra of **2c**

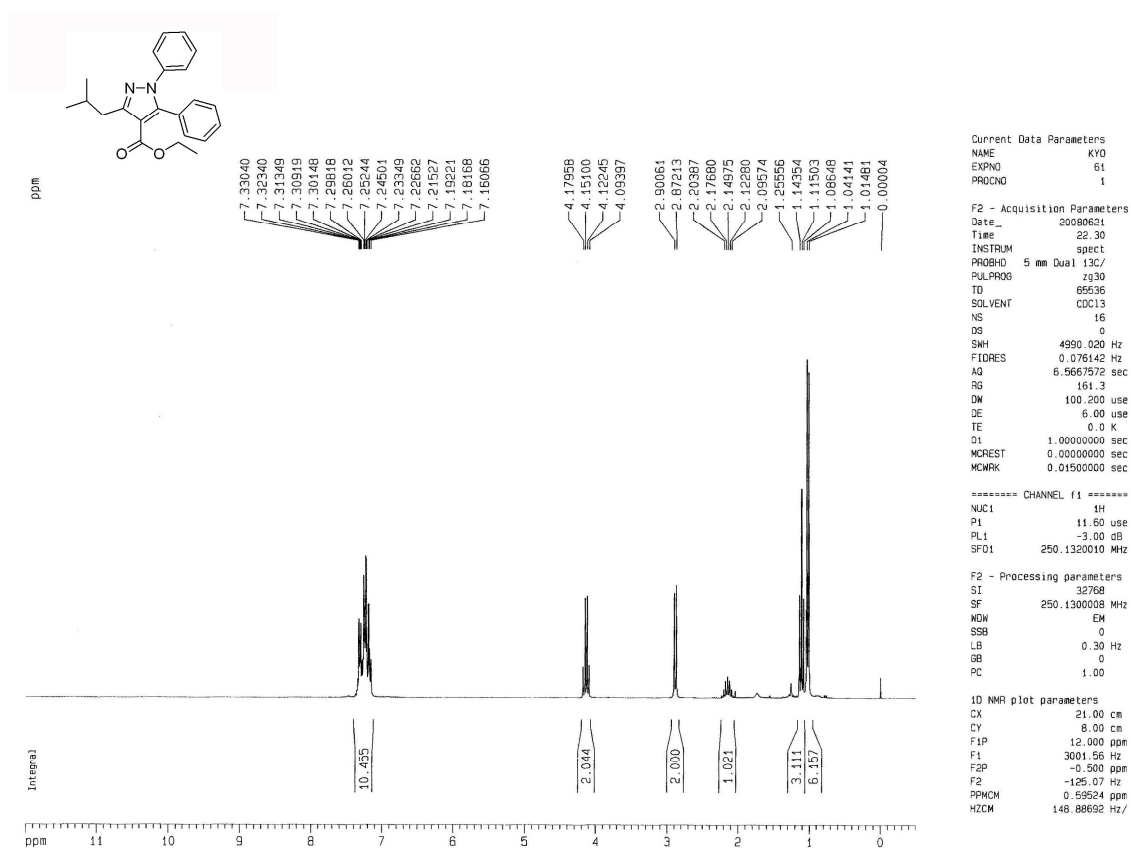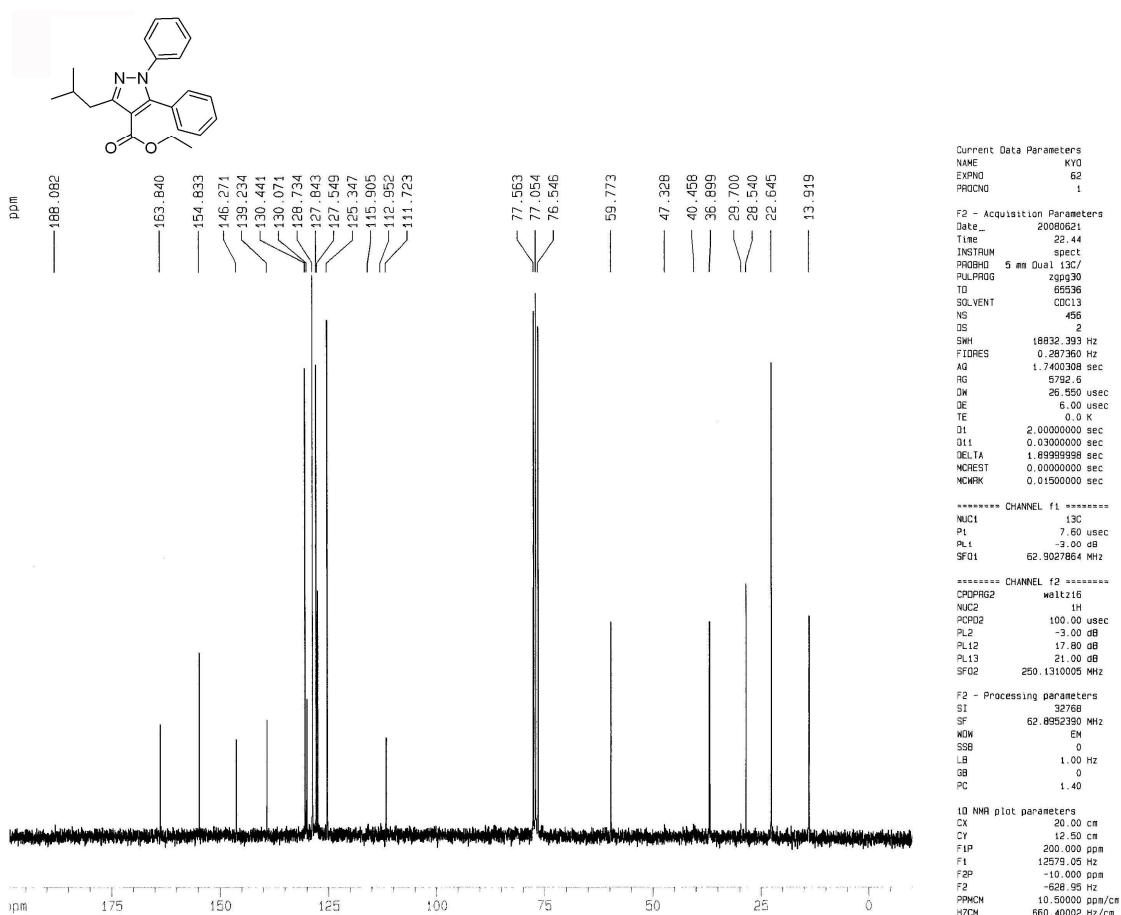



$^1\text{H}$  and  $^{13}\text{C}$  NMR spectra of **2e**

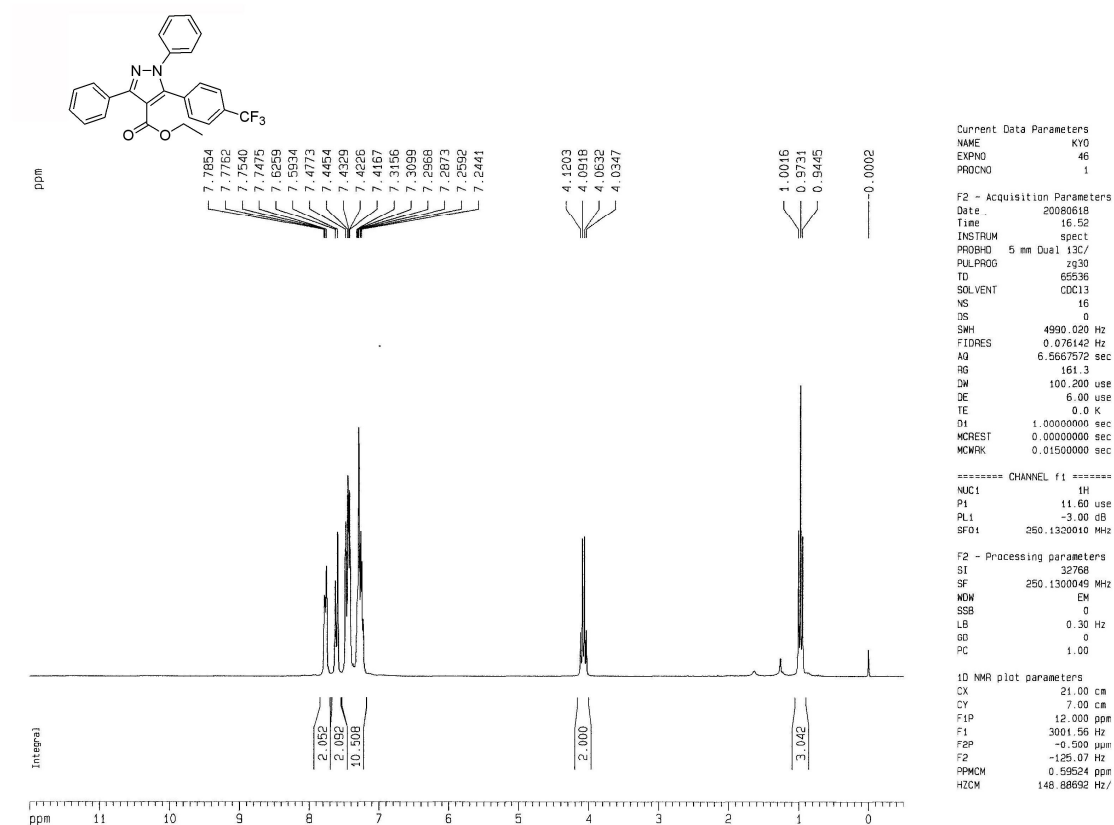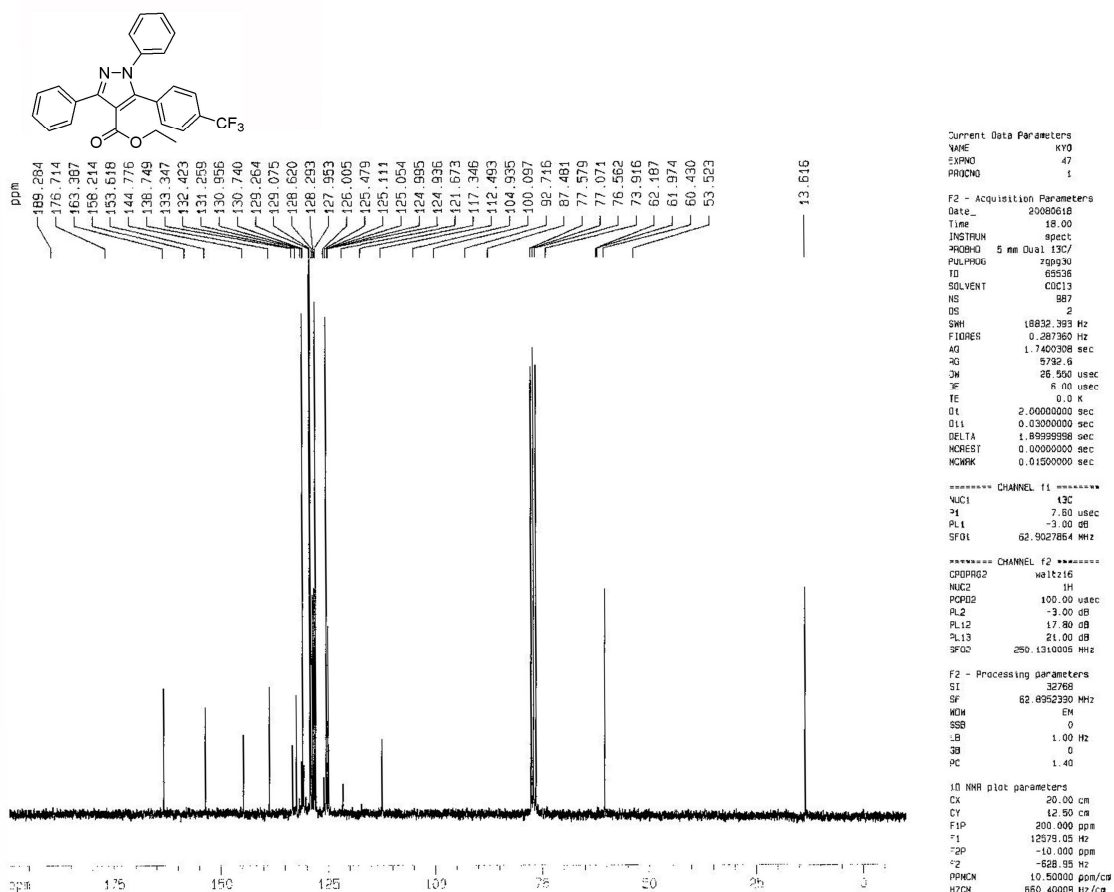

$^1\text{H}$  and  $^{13}\text{C}$  NMR spectra of **2f**

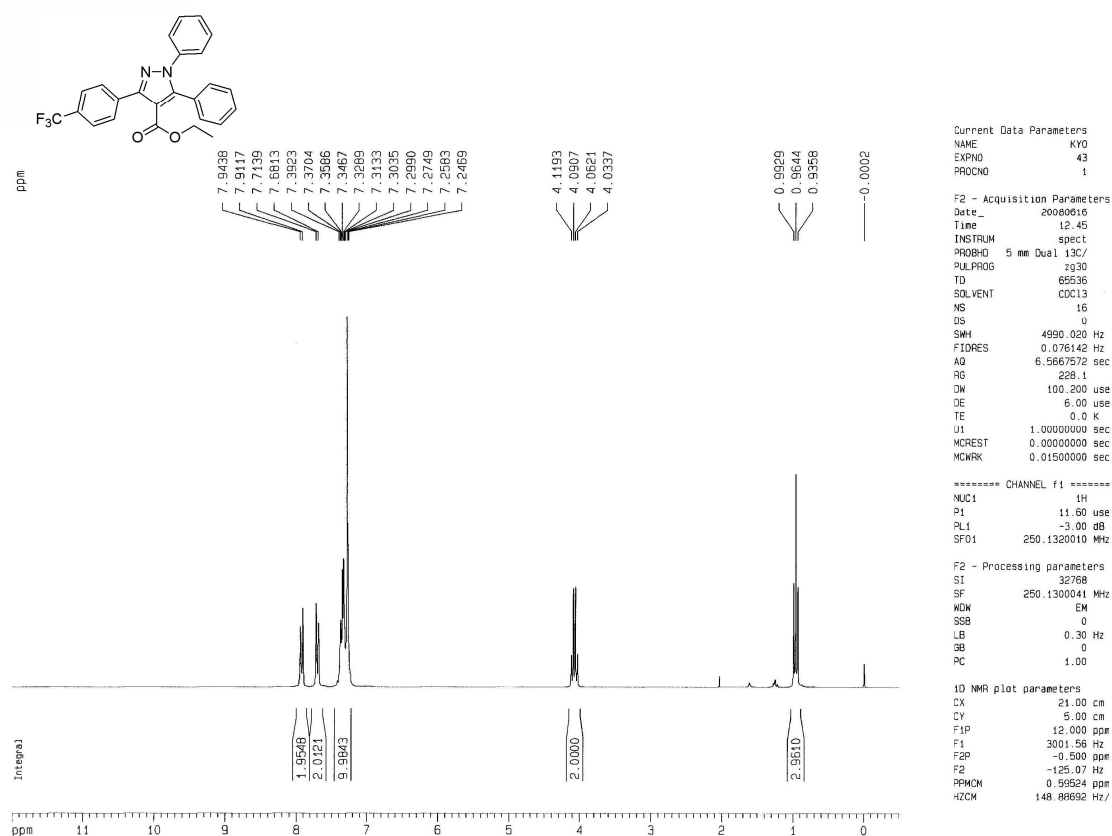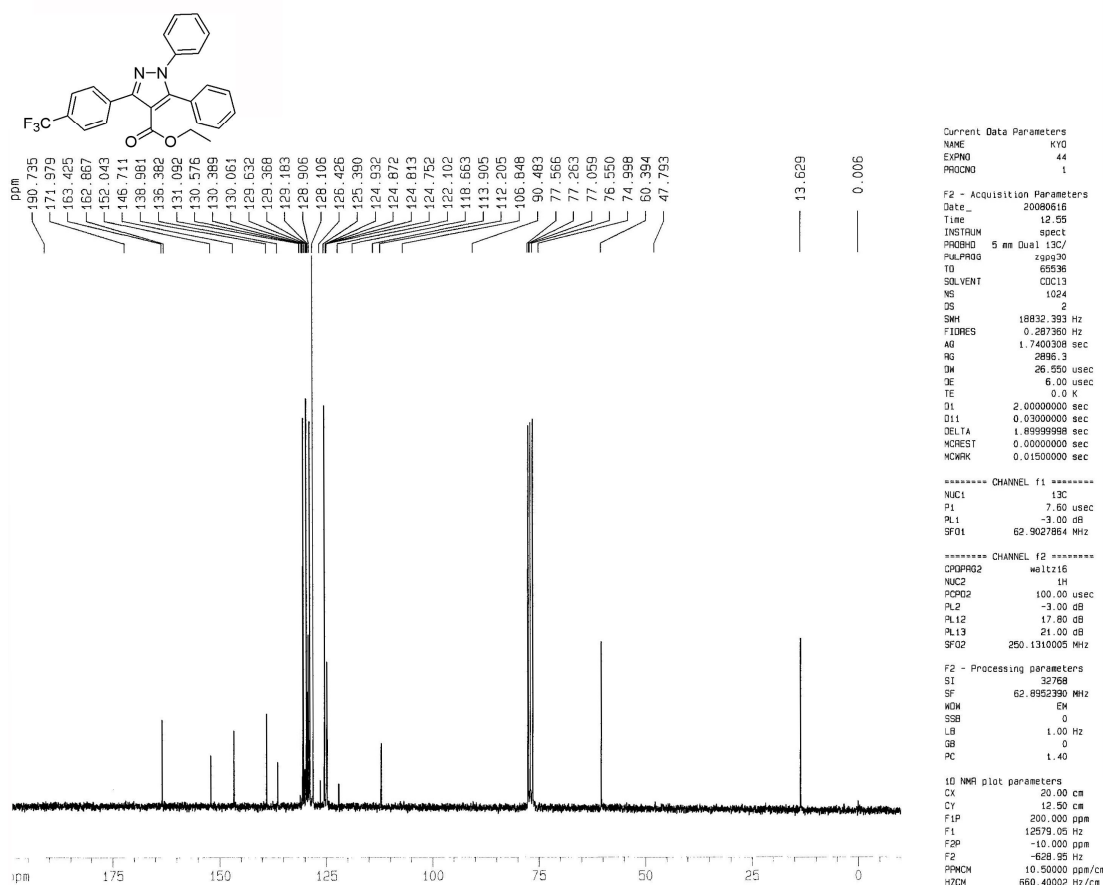

$^1\text{H}$  and  $^{13}\text{C}$  NMR spectra of **2g**

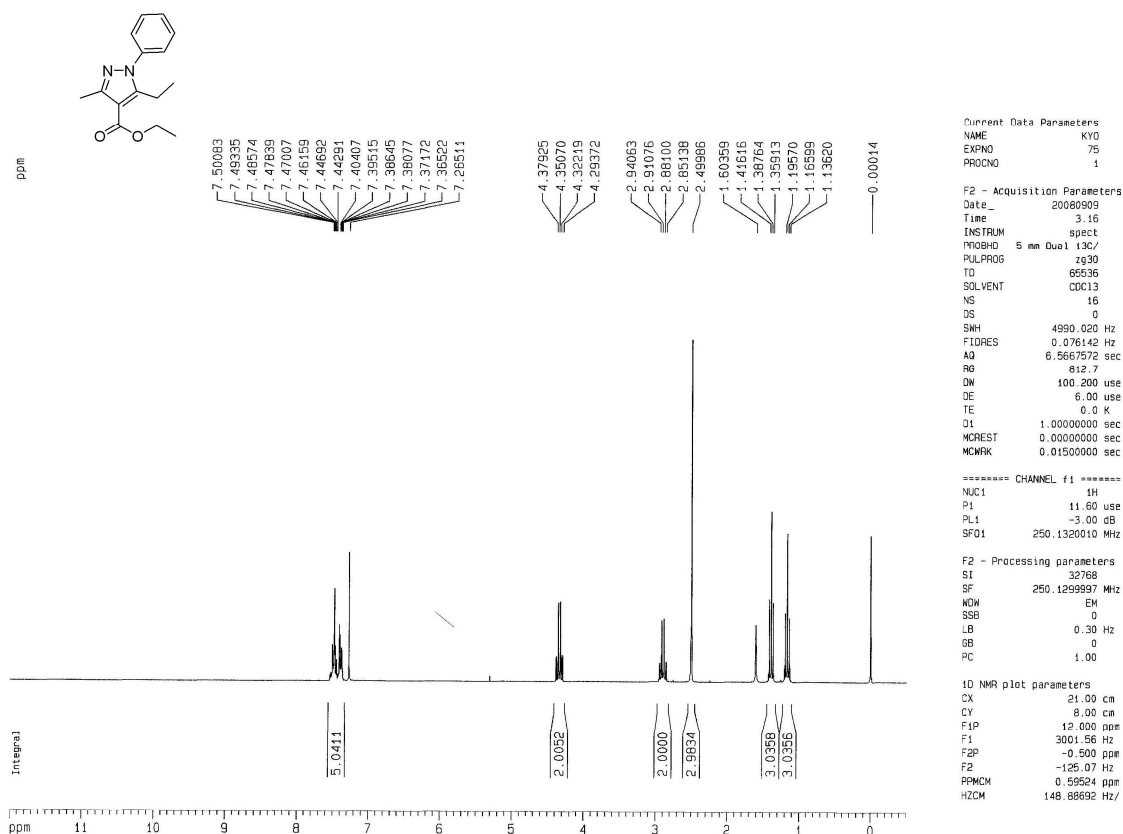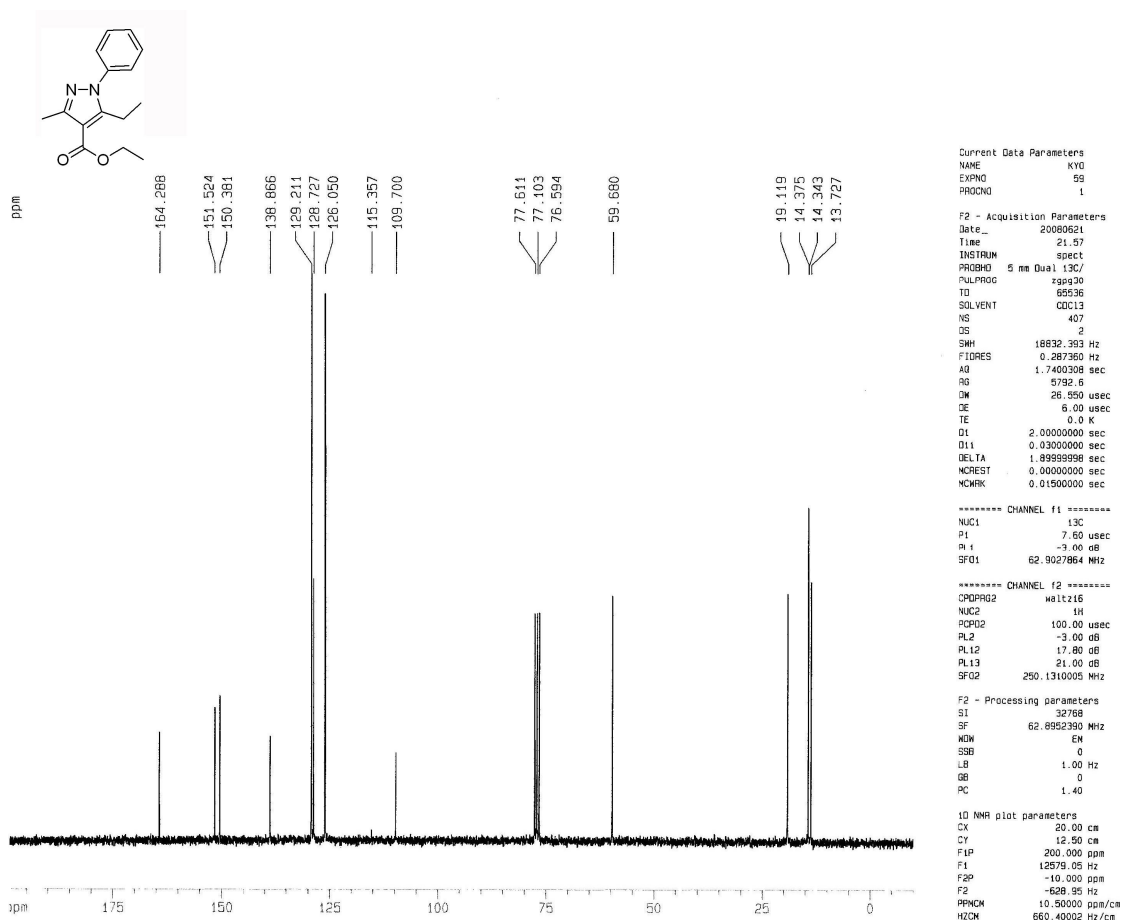



$^1\text{H}$  and  $^{13}\text{C}$  NMR spectra of **2h**

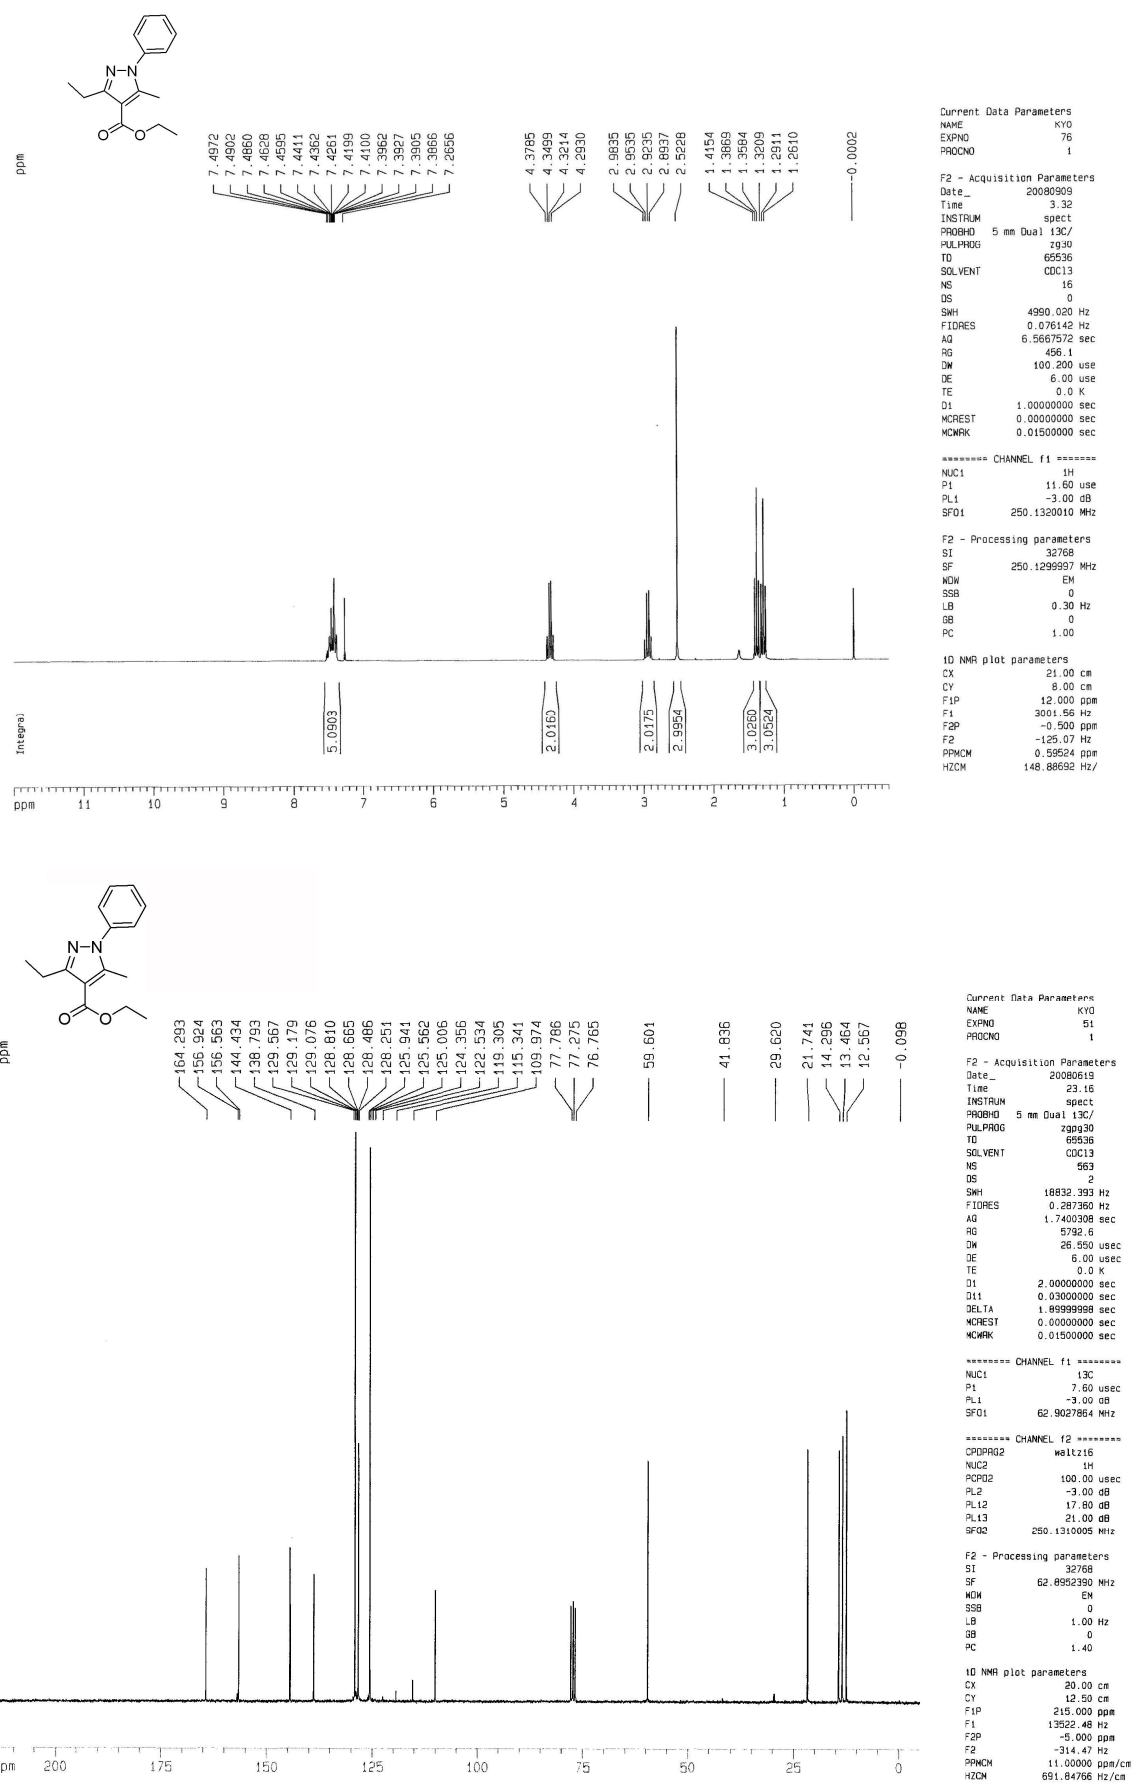

$^1\text{H}$  and  $^{13}\text{C}$  NMR spectra of **2i**

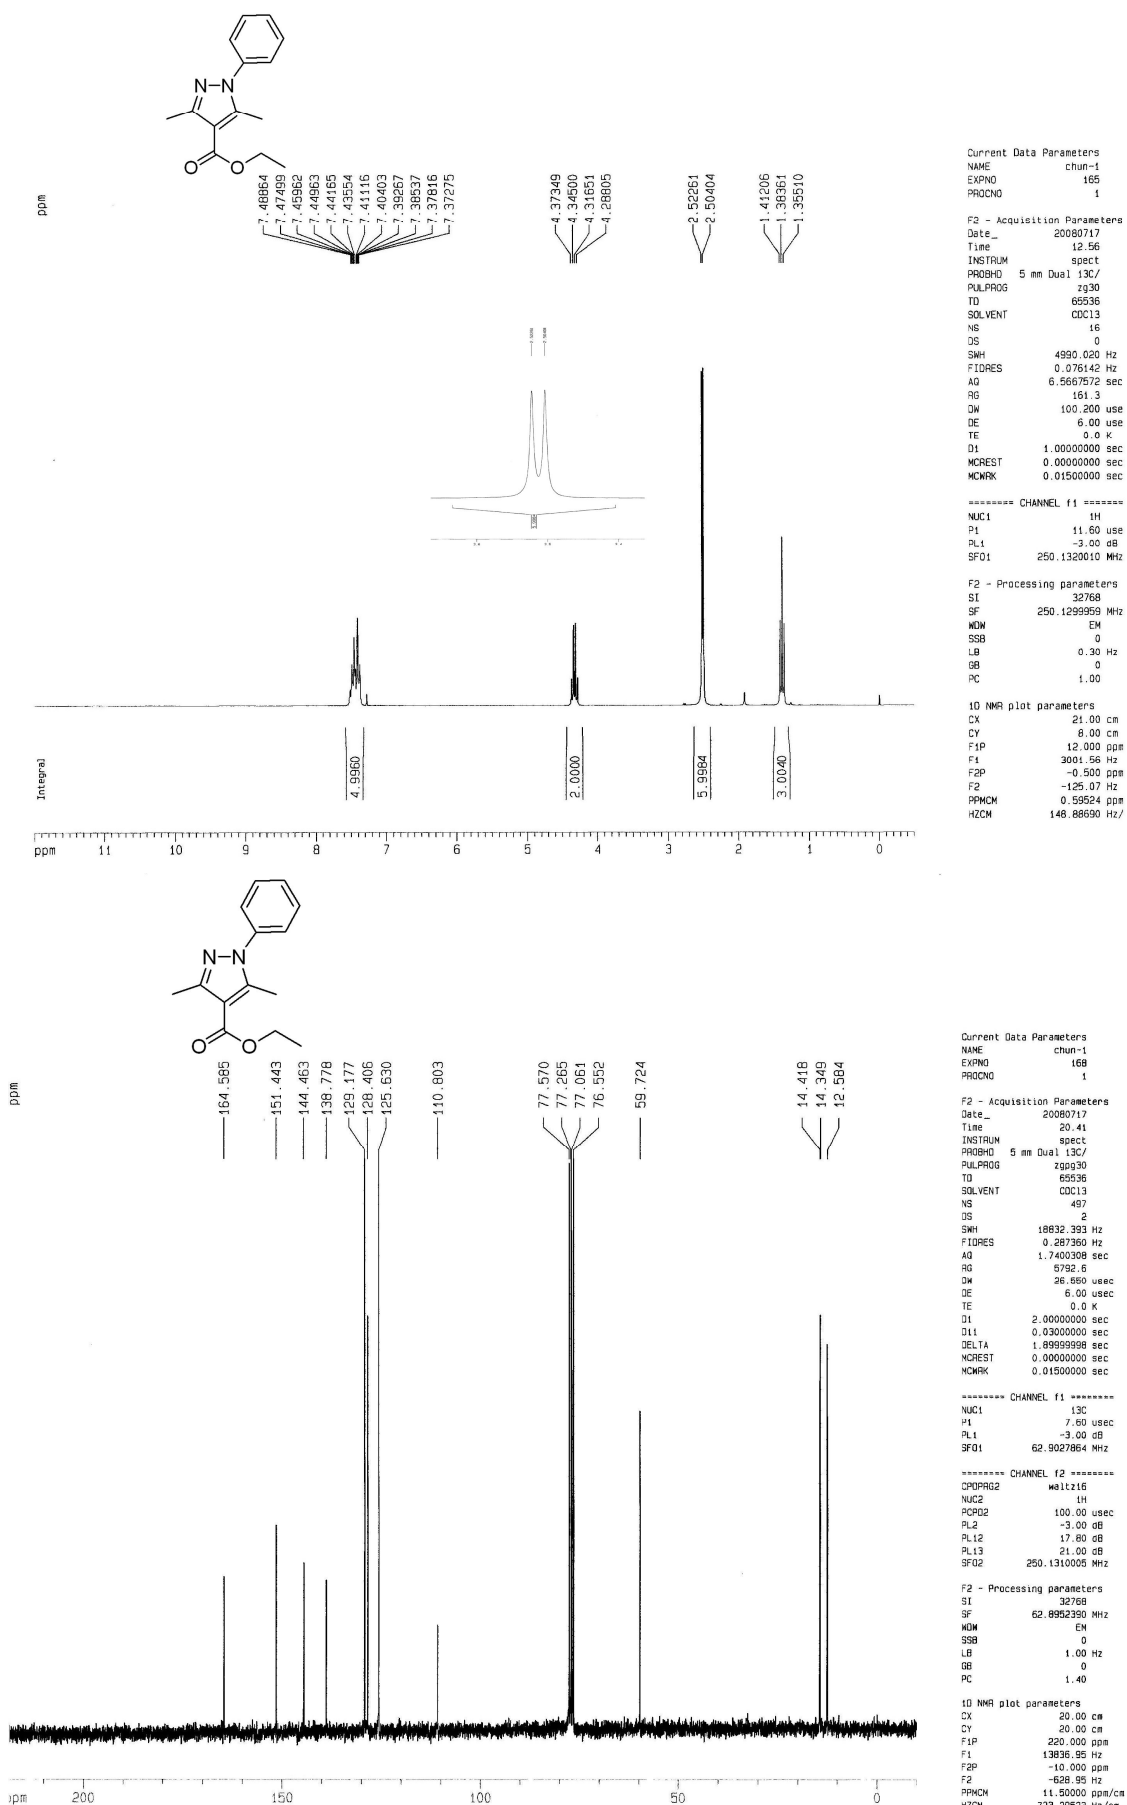

$^1\text{H}$  and  $^{13}\text{C}$  NMR spectra of **2j**

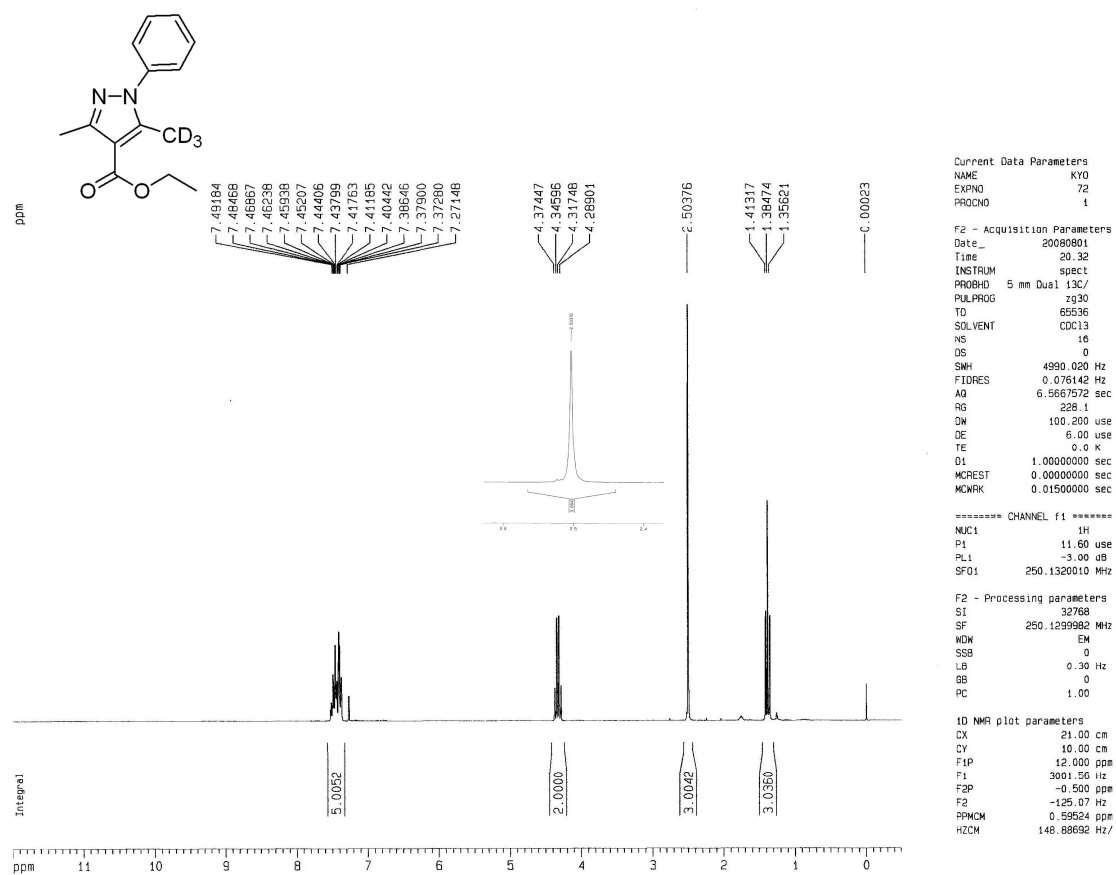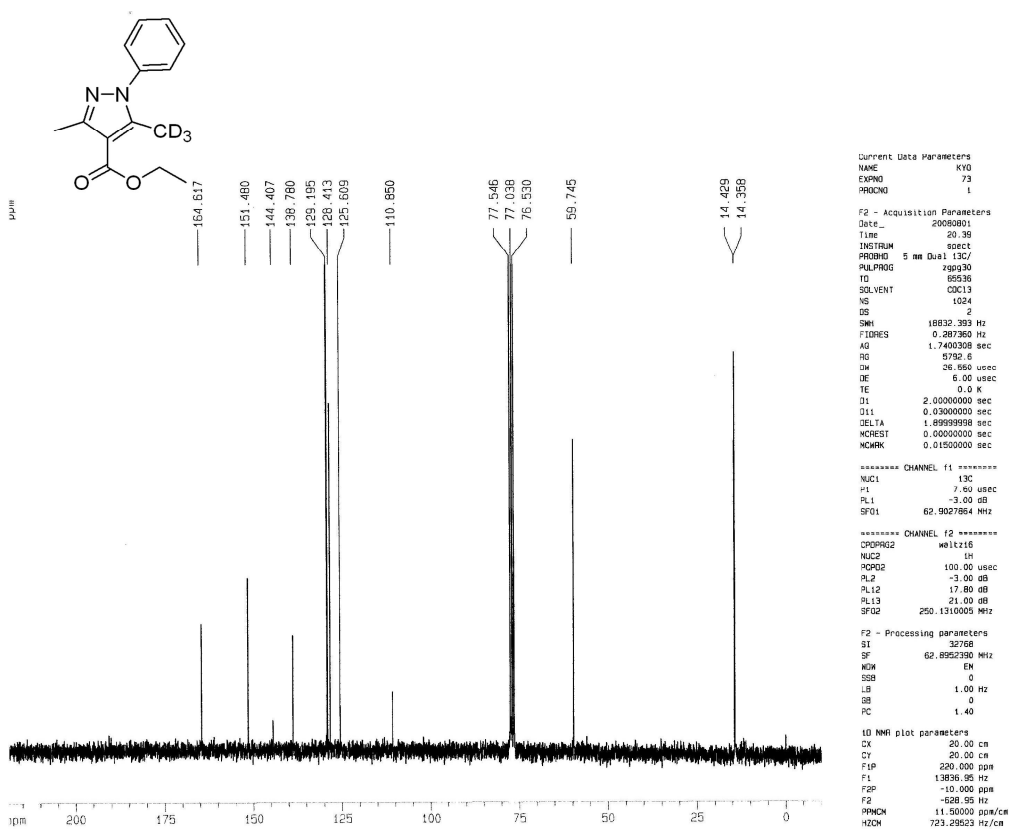

$^1\text{H}$  and  $^{13}\text{C}$  NMR spectra of **2k**

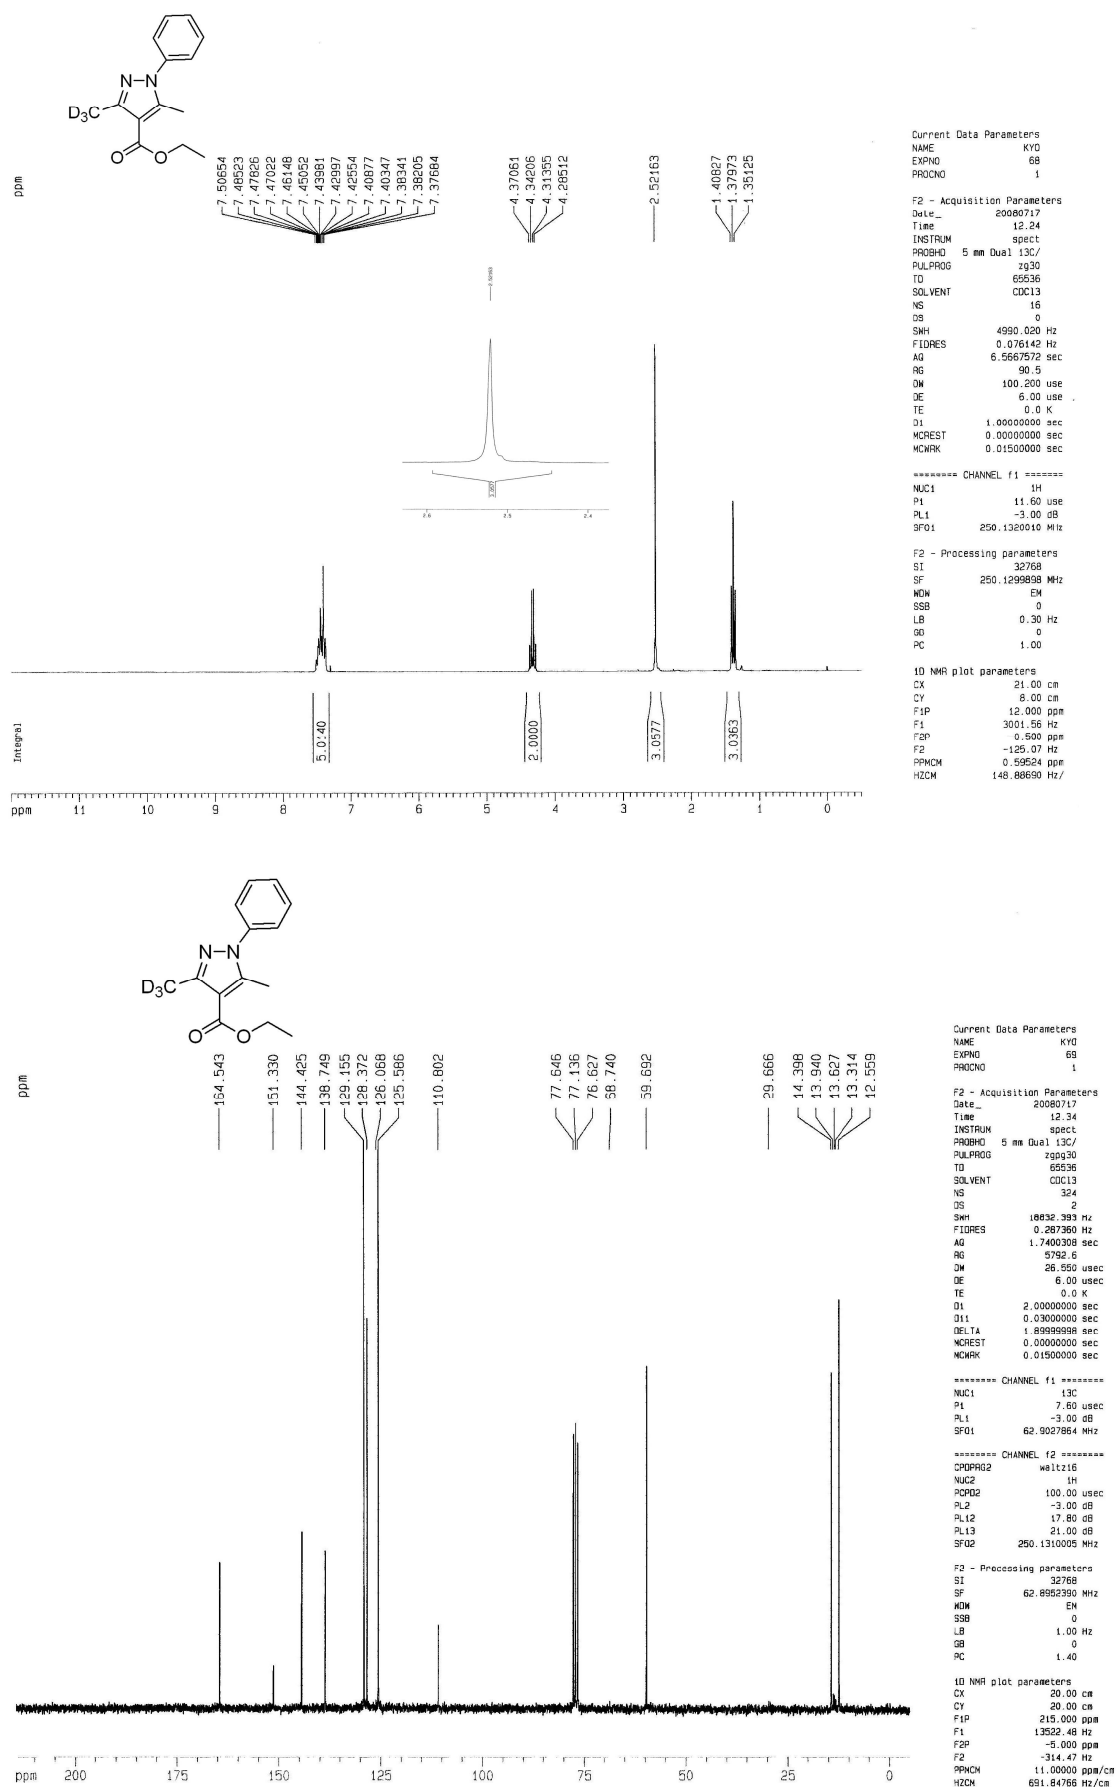

$^1\text{H}$  and  $^{13}\text{C}$  NMR spectra of 3

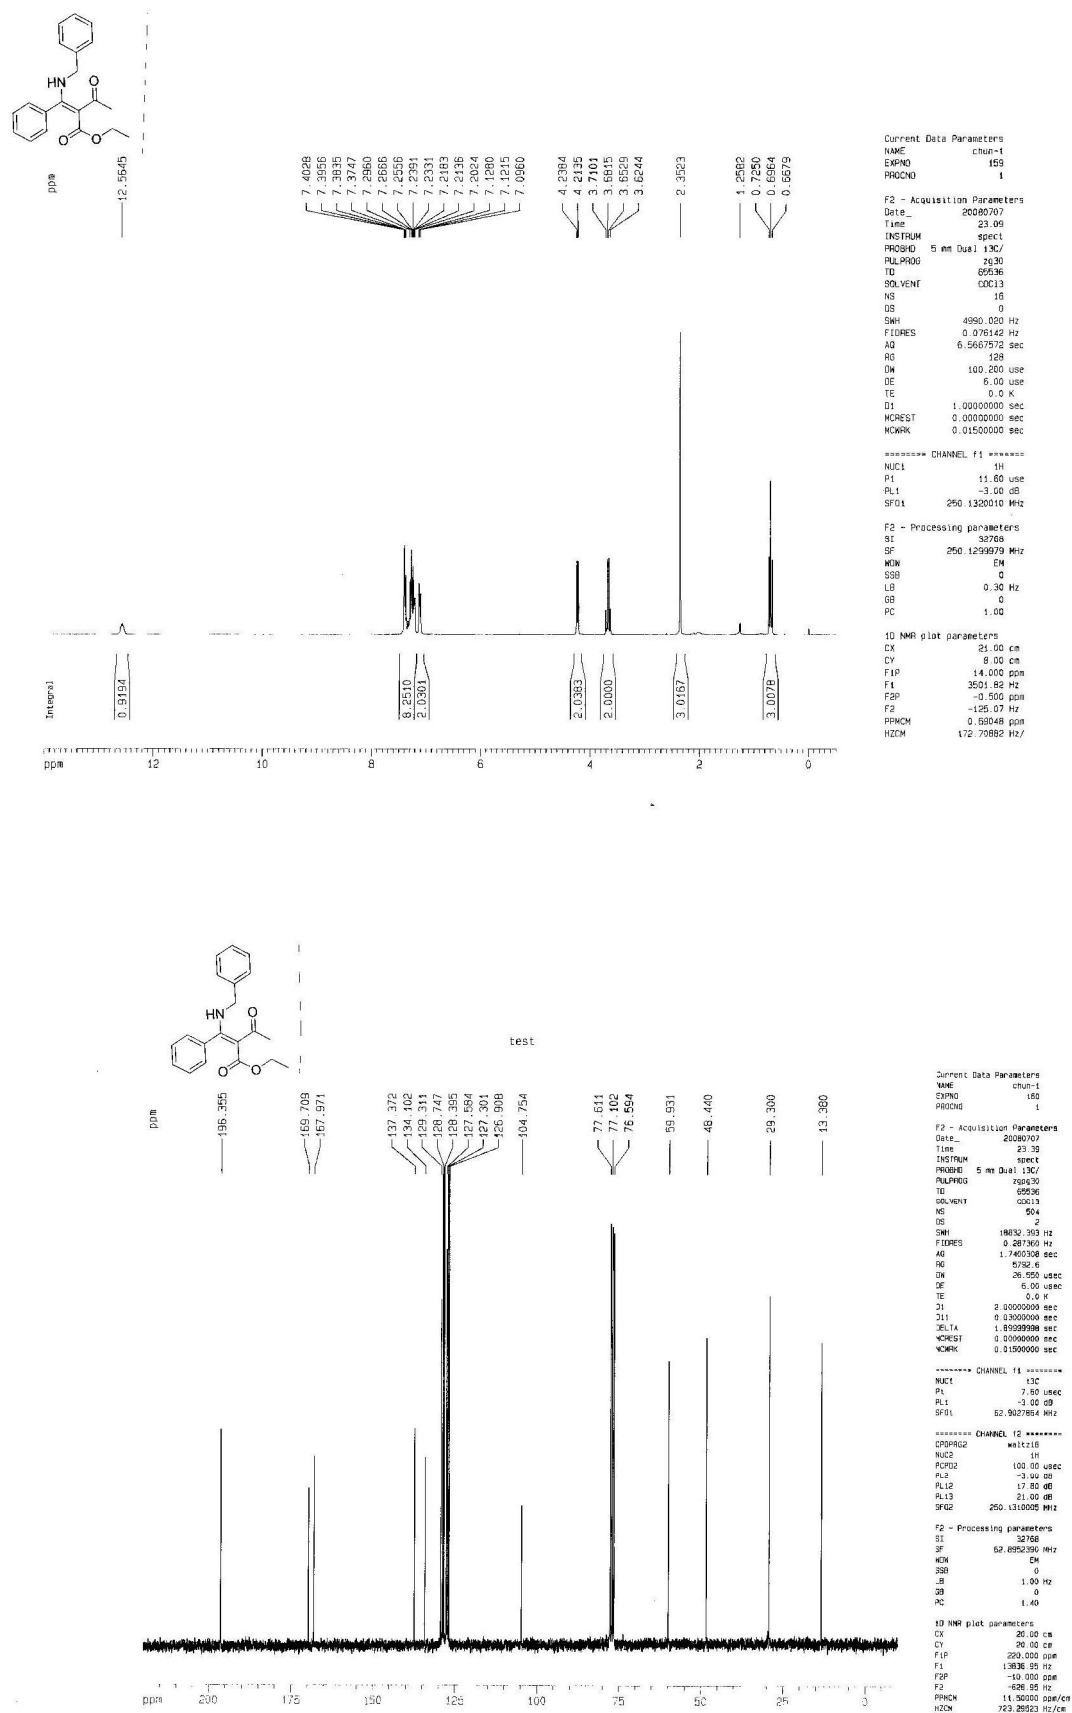

Supplement: b820324e.pdf [file b820324e.pdf]
